# Supplementary material
Source: PubMed Central journal article supplement (PMC7754930)
Supplement: TBSD_A_1850360_SM5972.pdf [file TBSD_A_1850360_SM5972.pdf]

**Supplementary Table 1.** Top upregulated miRNAs of downregulated targets and their corresponding lncRNA

| Micro RNA      | mRNA                                                                                                                                                                                                                                                                                                                                                                                                                                                                                                                                                                                               | lncRNA                                                                                                                       |
|----------------|----------------------------------------------------------------------------------------------------------------------------------------------------------------------------------------------------------------------------------------------------------------------------------------------------------------------------------------------------------------------------------------------------------------------------------------------------------------------------------------------------------------------------------------------------------------------------------------------------|------------------------------------------------------------------------------------------------------------------------------|
| hsa-miR-98-5p  | 'STEAP3', 'DYRK3', 'CXCL8', 'UBXN2B', 'PRDM4', 'TMEM41B', 'ZFAND5', 'SLC2A3', 'BACH1', 'HK2', 'OLR1', 'SLC16A3', 'IL6R', 'CEP135', 'ZBTB37', 'SLC11A2', 'YOD1', 'FBXW2', 'TGFB1', 'TET3', 'SLC20A1', 'GLO1', 'RGS16', 'NOLC1', 'STK4', 'CBL', 'THBS1', 'FOXO1', 'NRAS', 'CHST11', 'SLC17A5', 'CHML', 'STX3', 'IGF2BP2', 'MAPK6', 'PDZD8', 'SNX5', 'SLC19A2', 'LYN', 'CBX5', 'SLC31A1', 'C1GALT1', 'HMGA1', 'ARID3B', 'FAM104A', 'GDAP2', 'EIF2S3', 'STK17B', 'REL', 'ATP13A3', 'MXD1']                                                                                                             | XLOC_013024, TPTEP1, AC012314.20, RP11-54G14.1, LINC01287, MEG3, ERVH48-1, RP13-580B18.4, RP11-363G2.4, ERVH48-1, LINC01347, |
| hsa-miR-21-5p  | ['PFKFB2', 'MTPN', 'SLC26A2', 'LPGAT1', 'IREB2', 'PTEN', 'DERL1', 'SNX30', 'FOXO3', 'FOXO1', 'PTAR1', 'PRRC1', 'BASP1', 'SLC17A5', 'TP53BP2', 'OLR1', 'E2F3', 'RAB11FIP2', 'PAG1', 'NKTR', 'NAA50', 'MAP3K2', 'TSNAX', 'SLC31A1', 'CCDC14', 'ATP11B', 'YOD1', 'FAM126B', 'FOXN2', 'PTBP3', 'CLCN5', 'ETNK1', 'MGAT4A', 'B3GNT5', 'GPD2', 'CCNG1', 'ZNF217', 'PTX3', 'TRIM38', 'RAPGEF6', 'FKBP5', 'MEGF9']                                                                                                                                                                                         | Chr22-38_28785274-29006793.1, RP11-20A20.2, RP11-219J21.2, AC005235.1, RP11-6N13.4, LINC01079                                |
| hsa-miR-29a-3p | ['CDC42SE1', 'WDR26', 'INSIG1', 'PTEN', 'FOXO3', 'GLDN', 'FAM102B', 'ZFP36', 'TDG', 'GLUL', 'KDM6B', 'RIOK3', 'CCDC14', 'IFRD1', 'FGG', 'ZFP91', 'FOS', 'PTP4A1', 'TET3', 'CDK2', 'ASXL2', 'REL', 'MDM2', 'MXD1', 'LIMS1']                                                                                                                                                                                                                                                                                                                                                                         | AC058791.1, AC083843.1,                                                                                                      |
| hsa-let-7c-5p  | ['DYRK3', 'GSK3A', 'CXCL8', 'UBXN2B', 'SLC20A1', 'GLO1', 'CCNC', 'FOXO3', 'STK4', 'CBL', 'BACH1', 'THBS1', 'DCAF7', 'NRAS', 'RICTOR', 'STX3', 'CNNM2', 'MAPK6', 'IL6R', 'PDZD8', 'LYN', 'CEP135', 'CBX5', 'ZBTB37', 'SLC11A2', 'HMGA1', 'YOD1', 'ARMC8', 'ARID3B', 'FAM104A', 'GATAD2B', 'FBXW2', 'TGFB1', 'NUDT21', 'CCNG1', 'MXD1', 'BCL2L1']                                                                                                                                                                                                                                                    | AC091729.9, CASC7, RP11-785H5.1, RP11-819C21.1, TRG-AS1, TTTY15, VTRNA2-1, XIST                                              |
| hsa-let-7b-5p  | ['FAM49B', 'EIF4A1', 'CCNK', 'STEAP3', 'DYRK3', 'GSK3A', 'LPGAT1', 'CXCL8', 'UBXN2B', 'PRDM4', 'RBPJ', 'BACH1', 'DCAF7', 'HS2ST1', 'ELK4', 'TXNL4A', 'IL6R', 'SLC30A7', 'BNIP3L', 'CEP135', 'ZBTB37', 'IFRD1', 'SLC11A2', 'HAUS6', 'YOD1', 'FBXW2', 'TGFB1', 'MTPN', 'IDI1', 'USP15', 'WDR26', 'CBFB', 'SLC20A1', 'GLO1', 'NOLC1', 'DDX21', 'STK4', 'THBS1', 'GSPT1', 'NRAS', 'ATXN1L', 'E2F3', 'STX3', 'IGF2BP2', 'RBM12', 'MAPK6', 'PDZD8', 'SLC38A5', 'NAA50', 'LYN', 'CBX5', 'ERAP2', 'RIOK3', 'EIF2AK1', 'EAF1', 'C1GALT1', 'HMGA1', 'NUP153', 'ARID3B', 'FAM104A', 'MOB1B', 'CCNG1', 'MXD1'] | AC005879.11, AC009404.2, AC084082.3, AC091729.9, AC124997.1,                                                                 |

|                 |                                                                                                                                                                                                                                                                                                                                                                                                                                                                                                                   |                                                                                                                                                                            |
|-----------------|-------------------------------------------------------------------------------------------------------------------------------------------------------------------------------------------------------------------------------------------------------------------------------------------------------------------------------------------------------------------------------------------------------------------------------------------------------------------------------------------------------------------|----------------------------------------------------------------------------------------------------------------------------------------------------------------------------|
| hsa-miR-128-3p  | ['LIN54', 'FAM49B', 'SLC26A2', 'CCNK', 'DYRK3', 'INO80D', 'PDE3B', 'PTEN', 'GLRX', 'LITAF', 'DCAF7', 'UGCG', 'ARL5B', 'FAM213B', 'DDI2', 'ZNF800', 'RICTOR', 'E2F3', 'S1PR2', 'CNNM2', 'MAPK6', 'DCAF12', 'NAA50', 'NUS1', 'GDF15', 'CD300A', 'ZBTB37', 'HMGA1', 'FOXN2', 'ELL2', 'KBTBD11', 'TGFBR1', 'MOB1B', 'ETF1', 'DCP2', 'SDK2']                                                                                                                                                                           | Chr22-38_28785274-29006793.1, LOC401463, RP11-15H20.6, LINC00475, AC006116.21, TTTY10, CTC-360G5.9, ERVH48-1, RP1-71H24.6, ERVH48-1, MIR3179-1, TTTY10, MIR4313, LINC00609 |
| hsa-miR-181a-5p | ['PFKFB2', 'CCNK', 'TMF1', 'INO80D', 'LPGAT1', 'TFRC', 'ZFAND6', 'RGS16', 'PTEN', 'HSPA13', 'ZFP36L2', 'ELK4', 'NRAS', 'RASSF1', 'SLC19A2', 'NAA50', 'SRGN', 'H2AFY', 'FBXO34', 'YOD1', 'FOS', 'ATP2B1', 'TBX4', 'GATAD2B', 'DUSP6', 'TGFBR1', 'PTBP3', 'MOB1B', 'SLC25A37', 'KLF6', 'ZNF439', 'CCNG1', 'RLIM', 'TAB3', 'KRAS', 'RCOR1', 'ATG2B']                                                                                                                                                                 | Chr22-38_28785274-29006793.1, ZNF883, LINC00680, RP11-798G7.8, RP11-212D3.4, AC000403.4, AC004158.3, AC005618.6                                                            |
| hsa-miR-19b-3p  | ['WDR26', 'LPGAT1', 'SLC35D1', 'SLC44A1', 'ZFAND5', 'PTEN', 'DERL1', 'IKZF1', 'STK4', 'THBS1', 'MTMR6', 'DCAF7', 'RASSF1', 'ZNF800', 'ENPP4', 'PLXNC1', 'S1PR2', 'MBNL3', 'CCNL1', 'SNX5', 'NDEL1', 'SLC30A7', 'NUS1', 'CBX5', 'PAPD4', 'ARMC8', 'ELL2', 'GATAD2B', 'PATL1', 'PTP4A1', 'MOB1B', 'CPD', 'RLIM', 'ATP6V1B2', 'ZNF217', 'KIAA0907', 'WDFY2', 'MXD1', 'RAPGEF6', 'RCOR1', 'DCP2', 'ATG2B', 'TLR2']                                                                                                    | CTD-2334D19.1, chr22-38_28785274-29006793.1, CTC-529L17.1, RP11-523G9.3, RP11-141C7.4, RP11-475A13.2, RFX3-AS1, AC004448.5, AC002064.5, AC008269.2, AL132709.8             |
| hsa-miR-29c-3p  | ['CDC42SE1', 'KDM6B', 'WDR26', 'RIOK3', 'INSIG1', 'IFRD1', 'FGG', 'PTEN', 'ZFP91', 'DDX21', 'FOS', 'FAM126B', 'GLDN', 'PTP4A1', 'FAM102B', 'TDG', 'TET3', 'ASXL2', 'REL', 'MDM2', 'MXD1', 'DCAF12', 'LIMS1']                                                                                                                                                                                                                                                                                                      | Chr22-38_28785274-29006793.1, H19, RP11-272L13.3, LINC00377, AC058791.1, AC083843.1, AC113331.9, AP000350.5,                                                               |
| hsa-miR-124-3p  | ['ZNF451', 'CXCL8', 'SLC44A1', 'UBXN2B', 'NCF2', 'PDE3B', 'SNX13', 'RBPJ', 'LITAF', 'HS2ST1', 'FAM102B', 'ARL5B', 'RASSF1', 'DDI2', 'CDC27', 'SLC16A6', 'PIM1', 'DLEU1', 'CPNE3', 'IL6R', 'SLC30A7', 'ZBTB37', 'HAUS6', 'IRAK3', 'PTBP3', 'UHMK1', 'PTP4A1', 'RAB31', 'ELF4', 'MMP19', 'FAR1', 'ZNF678', 'CACUL1', 'BIRC2', 'MTPN', 'SLC26A2', 'INO80D', 'ROCK1', 'FAM35A', 'CBL', 'SAMSN1', 'MTMR6', 'ZFP36L2', 'BLOC1S6', 'NRAS', 'CHSY1', 'G3BP1', 'SLC17A5', 'CNNM2', 'SLC38A5', 'OSBPL8', 'WTAP', 'SLC31A1', | AC005592.3, AC018647.3, AC073043.1, AC096772.6, AL022344.7, C14orf132, C1orf132, chr22-38_28785274-29006793.1, LINC01410, RP11-764K9.1,                                    |

|                |                                                                                                                                                                                                                                                                                                                                                                                                                                                                                                           |                                                                                                                                                                         |
|----------------|-----------------------------------------------------------------------------------------------------------------------------------------------------------------------------------------------------------------------------------------------------------------------------------------------------------------------------------------------------------------------------------------------------------------------------------------------------------------------------------------------------------|-------------------------------------------------------------------------------------------------------------------------------------------------------------------------|
|                | 'HMGA1', 'RAB27A', 'FHDC1', 'MYO19', 'SNX18', 'KLF6', 'GNPDA1', 'TTLL3', 'KCNS3', 'CDK2', 'TRIM38', 'SLC25A36', 'IL18R1']                                                                                                                                                                                                                                                                                                                                                                                 | LINC01410, CTC-360G5.9, RP11-473M20.9, LINC00960, CTC-459F4.3, LINC01410, LINC00643,                                                                                    |
| hsa-miR-192-5p | ['CD83', 'PRDM4', 'SNX13', 'ZXDC', 'SLC16A6', 'PIM1', 'SLC39A8', 'ENPP4', 'EMB', 'UPP1', 'IL6R', 'FADS1', 'CSGALNACT2', 'IFRD1', 'ENTPD7', 'FOS', 'FAM126B', 'FBXW2', 'B3GNT5', 'EHBP1L1', 'IDI1', 'SLC26A2', 'STXBP4', 'INSIG1', 'UBA5', 'ARHGAP19', 'OGFRL1', 'BLOC1S6', 'PRRC1', 'TDG', 'NPHP3', 'CHML', 'MBNL3', 'RAB11FIP2', 'SLC19A2', 'CEP78', 'NAA50', 'OSBPL8', 'PCGF5', 'CCDC14', 'H3F3A', 'EAF1', 'RAB27A', 'DDHD1', 'FHDC1', 'ELL2', 'KBTBD11', 'NCEH1', 'KCNS3', 'STK17B', 'CRLF3', 'LIMS1'] | AC011747.4, C1orf132, CASC7, CTC-273B12.8, chr22-38_28785274-29006793.1, RP11-268G12.3, RP11-757G1.6, RP11-216M21.7, FAM183CP                                           |
| hsa-miR-27a-3p | ['LIN54', 'FAM49B', 'SLC26A2', 'CCNK', 'DYRK3', 'INO80D', 'DERL1', 'NOLC1', 'LITAF', 'DCAF7', 'FOXO1', 'ZFP36L2', 'UGCG', 'NRAS', 'ZFP36', 'ARL5B', 'DDI2', 'CDC27', 'OLR1', 'ZNF800', 'TRIM27', 'HMGN1', 'NAA50', 'NUS1', 'ZBTB37', 'FOXN2', 'ELL2', 'TGFB1', 'NUDT21', 'KRAS']                                                                                                                                                                                                                          | AC013394.2, AC018647.3, AC018647.3, chr22-38_28785274-29006793.1, RP13-554M15.8, TTTY10, LINC00475, CTD-2017D11.1                                                       |
| hsa-let-7g-5p  | ['DYRK3', 'CXCL8', 'UBXN2B', 'SLC20A1', 'GLO1', 'STK4', 'BACH1', 'THBS1', 'STX3', 'MAPK6', 'IL6R', 'PDZD8', 'LYN', 'CEP135', 'CBX5', 'SLC11A2', 'ZBTB37', 'HMGA1', 'YOD1', 'ARID3B', 'FAM104A', 'FBXW2', 'TGFB1', 'KRAS', 'MXD1', 'BCL2L1']                                                                                                                                                                                                                                                               | AC009404.2, AC084082.3, AC091729.9, AC124997.1, chr22-38_28785274-29006793.1, TPTEP1, AC012314.20, RP11-54G14.1, MEG3, LINC01287, ERVH48-1,                             |
| hsa-miR-218-5p | ['PANK3', 'TFRC', 'COX15', 'RBPJ', 'FOXO3', 'CBL', 'GLDN', 'GSPT1', 'BLOC1S6', 'FAM102B', 'NRAS', 'ZXDC', 'NAMPT', 'PIP4K2A', 'RICTOR', 'EMB', 'FNIP1', 'CNNM2', 'RIMKLB', 'PDZD8', 'FADS1', 'STARD4', 'PNPLA8', 'SLC11A2', 'HPS4', 'HMGA1', 'MBOAT2', 'ZFP91', 'FOXN2', 'NAMPTP1', 'ELL2', 'FAM104A', 'FBXW2', 'PTP4A1', 'RIT1', 'EIF2S3', 'ETNK1', 'MDM2', 'SPOPL', 'AVL9', 'CACUL1', 'SLC25A36', 'DCP2', 'SNTB1', 'BCL2L1']                                                                            | Chr22-38_28785274-29006793.1, RP11-586K12.10, RP11-1437A8.4, RP11-679B19.2, RP11-599B13.3, RP11-508N22.9, RP11-403B2.6, AC005618.6, AC007246.3, AC018647.3, AC018647.3, |

## Drug perturbation signatures

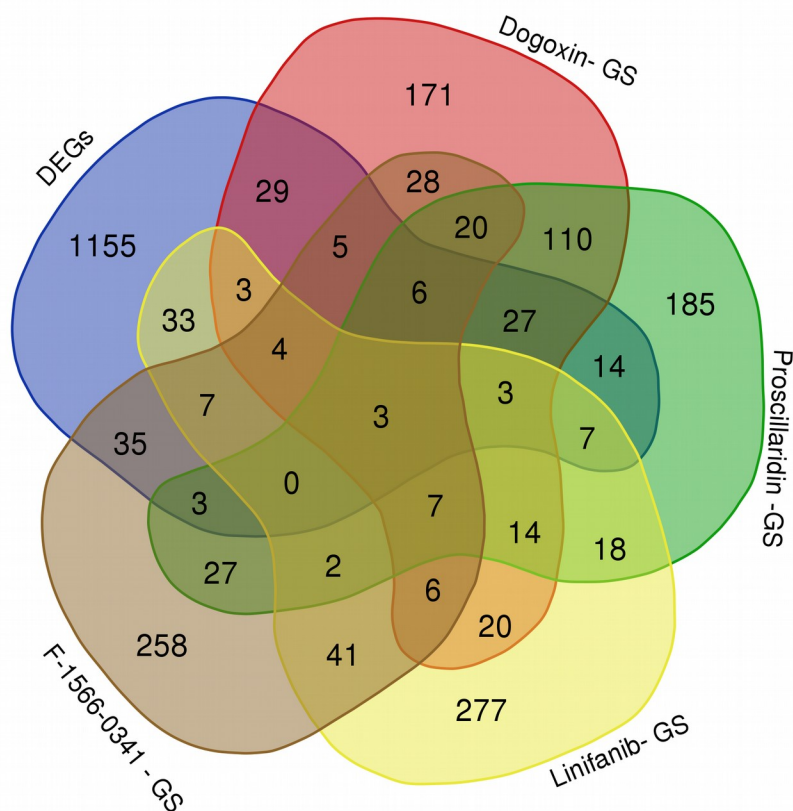

**Supplementary figure 1.** Venn diagram that represents the common genes from the gene signature patterns reversed by the drug perturbagens.

## Supplementary Table 2. The gene signatures identified from the drug perturbagens

| Names of Signatures                                                | total | Common genes                                                                                                                               |
|--------------------------------------------------------------------|-------|--------------------------------------------------------------------------------------------------------------------------------------------|
| DEGs Dogoxin- GS F-1566-0341 - GS Linifanib- GS Proscillaridin -GS | 3     | GADD45B SAT1 NUPL1                                                                                                                         |
| DEGs Dogoxin- GS Linifanib- GS Proscillaridin - GS                 | 3     | RPS27L UGCG ID3                                                                                                                            |
| DEGs Dogoxin- GS F-1566-0341 - GS Proscillaridin -GS               | 6     | NR4A2 PER1 FOSB PSPH INHBA CLU                                                                                                             |
| DEGs Dogoxin- GS F-1566-0341 - GS Linifanib- GS                    | 4     | PHYH SLC2A3 GLUL STK17B                                                                                                                    |
| Dogoxin- GS F-1566-0341 - GS Linifanib- GS Proscillaridin -GS      | 7     | HSPA8 IL8 HMOX1 FOXJ3 MAFF STEAP1 ATP1B1<br>ZNF331 PIP4K2B LDLR TAF1D WSB1 AREG                                                            |
| DEGs Dogoxin- GS Proscillaridin -GS                                | 27    | RGS1 THBS1 METTL13 HNRNPA1 RGS16<br>TIPARP PPARG FBXW2 ABCC4 DUSP1 PER2<br>IL6 NUP98 ITGB1BP1 CCNL1 DUSP6<br>KIAA0907 FOS JUNB RNASET2 JUN |
| DEGs Dogoxin- GS Linifanib- GS                                     | 3     | CHST15 ALOX5 UCHL1                                                                                                                         |

|                                                   |     |                                                                                                                                                                                                                                                                                                                                                                                          |
|---------------------------------------------------|-----|------------------------------------------------------------------------------------------------------------------------------------------------------------------------------------------------------------------------------------------------------------------------------------------------------------------------------------------------------------------------------------------|
| DEGs Dogoxin- GS F-1566-0341 - GS                 | 5   | PTGS2 TPD52L1 BHLHE40 INSIG1 RAD51C                                                                                                                                                                                                                                                                                                                                                      |
| DEGs Linifanib- GS Proscillaridin -GS             | 7   | CD99 NDRG1 CPE ETS2 KLF6 RAB31 STXBP2                                                                                                                                                                                                                                                                                                                                                    |
| DEGs F-1566-0341 - GS Proscillaridin -GS          | 3   | KLHL9 TNFAIP3 RIOK3                                                                                                                                                                                                                                                                                                                                                                      |
| DEGs F-1566-0341 - GS Linifanib- GS               | 7   | CST3 FOXO1 JUP BNIP3L SIK1 CFD CSGALNACT2                                                                                                                                                                                                                                                                                                                                                |
| Dogoxin- GS Linifanib- GS Proscillaridin -GS      | 14  | JUND HLA-DQA1 BRD2 HMGCS1 RYBP FAM129A SCD5 EMP1 ARPP19 HNRNPH3 TXNIP RGS2 TIMM9 KCNJ15 SNAPC1 KLF4 WNT5A ENPP2 PPP1R15A                                                                                                                                                                                                                                                                 |
| Dogoxin- GS F-1566-0341 - GS Proscillaridin -GS   | 20  | EGFR NR4A1 PMAIP1 SULF1 TXNL4B CLEC11A ATF3 HBEGF EGR1 SERPINB2 GABPB1 EGR3 FOSL2 HSPH1 AKR1C3                                                                                                                                                                                                                                                                                           |
| Dogoxin- GS F-1566-0341 - GS Linifanib- GS        | 6   | MSMB CHI3L1 CLIC5 CXCL14 FBLN1 CD24                                                                                                                                                                                                                                                                                                                                                      |
| F-1566-0341 - GS Linifanib- GS Proscillaridin -GS | 2   | SEL1L3 CRK                                                                                                                                                                                                                                                                                                                                                                               |
| DEGs Dogoxin- GS                                  | 29  | C5AR1 HES1 ATP1A1 AKIRIN1 ZFP36 SGK1 OLR1 MKKS CD302 PIK3C2B SLC26A2 SLC35D1 MINA CRIP1 ZNF32 PSMB3 NDEL1 DSP CRYAB KRAS ARL4C NUPR1 ZBTB43 PFKFB3 BST2 EIF4A1 SLC1A4 JARID2 HMGA1                                                                                                                                                                                                       |
| DEGs Proscillaridin -GS                           | 14  | IRAK1 SORL1 TRA2B PHLDA1 CD300A DIXDC1 CD83 GLRX TLK2 THYN1 STC1 VEGFC H1F0 IL1R2 CXCR4 UQCR11 OSBPL8 TRIM2 LAMP3 PDZRN3 FN1 IER3 NGFRAP1 RUNX1T1 FKBP5 LRIG1 MME ICAM2 NAP1L1 PLCB4                                                                                                                                                                                                     |
| DEGs Linifanib- GS                                | 33  | AQP3 IGFBP6 HBB PLVAP MYL6B PLA2G2A ZFP36L2 TRAPPC2L CD9 TMEM41B METTL9 SLC16A6 DR1 KLF10 SFRP1 ATP2B1 MAMLD1                                                                                                                                                                                                                                                                            |
| DEGs F-1566-0341 - GS                             | 35  | GDF15 MITF CSF3R QDPR CHST11 MRPL15 SERTAD2 OSBPL10 ELF1 IRS2 BCL6 NAMPT CRIP2 PPIC SLC19A2 FGG CKB TNFRSF11B NCF2 HDAC9 SRGN PTX3 PEL1 IFRD1 SNX7 RORA DDIT4 PDZD8 IFI30 HK2 CAP2 PTP4A1 SGCE GPRC5B FOXO3                                                                                                                                                                              |
| Dogoxin- GS Proscillaridin - GS                   | 110 | UGT2B17 MREG BRCA1 C1ORF63 PPP3CA FBXO11 HSPD1 ADH5 SERPING1 SRSF11 DUSP5 ID1 EZR FGFR3 FCGBP UBXN7 OLFML2A PDGFD GPATCH8 THY1 SQLE IMPA2 NET1 XPOT NR4A3 LCMT2 POP4 LINC00094 EFEMP1 TBC1D16 COMMD8 MTF2 KDM5B AXL NRN1 SPRY1 C14ORF132 TSC22D2 TRAK2 C2ORF43 PSMG1 RPRD1A KLF5 APOLD1 TRA2A TMEM87A GAS1 RELB LOC100506935 DLC1 PLEKHF1 PCBP2 ASF1A ST6GAL1 COL11A1 NAT1 CYR61 C6ORF62 |

|                                     |    |  |                                                                                                                                                                                                                                                                                                                                                                                                                                                                                                                                                                                                                                                                                                                                                                                                                                                                                                                                                                                                                                                                                                                                                                                                                                                                                                               |
|-------------------------------------|----|--|---------------------------------------------------------------------------------------------------------------------------------------------------------------------------------------------------------------------------------------------------------------------------------------------------------------------------------------------------------------------------------------------------------------------------------------------------------------------------------------------------------------------------------------------------------------------------------------------------------------------------------------------------------------------------------------------------------------------------------------------------------------------------------------------------------------------------------------------------------------------------------------------------------------------------------------------------------------------------------------------------------------------------------------------------------------------------------------------------------------------------------------------------------------------------------------------------------------------------------------------------------------------------------------------------------------|
|                                     |    |  | IER2 GNAI3 GPR116 SMAD3 TSC22D3<br>IGFBP7 GTF3A ECM1 PLAGL1 ARPC5<br>TSPYL2 TUFT1 CHL1 TMEM14A SDC4 FHL2<br>KIF2C ADO GPRC5A RRS1 NXF1 TRIAP1<br>FANCF CCL2 RGS5 TLE1 PLK2 HNRPD<br>FAM198B DNMBP NQO1 PSAT1 IQGAP1 LTF<br>H1FX MRP63 C19ORF2 SERPINE1 PTBP2<br>PDS5A WSB2 CSRP2 QRSL1 ARID4B KCTD12<br>LRRC16A KHDRBS1 ANXA4 YTHDC1<br>CRISPLD2 FOSL1 CBR1<br>CPD C3ORF14 BMP2 TMEM5 NBEA<br>TACSTD2 NRGN TM9SF3 DOK5 RNF11 CLGN<br>SOX4 TRIM22 CD59 SERPINE2 CYTL1 SEPX1<br>GPX3 STC2 ACTA2<br>C20ORF103 TF SDC2 TNFAIP6 GAL CA12<br>FASTKD5 LGALS3 AKAP12 ID2 RAPGEF2<br>AKR1C1 CFLAR PLEKHA5 MACF1 FBN2<br>COL15A1 ELF3 AKR1C2 MAPT MFSD10<br>BTBD3 MSX1 CHIC2 TXNDC9 CADM1<br>AHNAK2 UAP1<br>TCF4 CADPS2 C1ORF115 STAB1 TBL1XR1<br>SRPX PDE4DIP SPON1 CDC42 HPGD<br>CAMK2N1 ECI2 NFIB SCGB2A2 GALE POP5<br>SPARC PMEPA1<br>COL4A5 CEACAM6 ELANE FABP5 ARIH1<br>IFI16 CSRP1 TYRP1 EIF5A CCNA2 CLCN3<br>DNAJB1 TIMP3 CD55 DCLK1 DNAJC12<br>B3GNT1 AZU1 FAM46A PRTN3 PROM1<br>RSRC2 FAM70A CDKN2A RBP1 TGFBI CTSC<br>G3BP1 KIAA1199 PDIA3 HNRNPR EIF1AX<br>TOX3 KDM6A KRT17 BAG3 SST TSPYL5<br>PDZK1IP1 NKX3-1 XIST CCDC56 CDKN1A<br>CALD1 KCNJ16 LAPTM4B KLK6 S100P<br>LAMP1 PLK1 TNFSF10 CD36 KIF5B COL6A2<br>ABCC3 HSPA1A SFRP4 KRT14 CDH1<br>SECISBP2L BICC1 DKK1 DEPTOR KLK10<br>SCNN1A ENC1 KRT5 LCN2 |
| Dogoxin- GS Linifanib- GS           | 20 |  |                                                                                                                                                                                                                                                                                                                                                                                                                                                                                                                                                                                                                                                                                                                                                                                                                                                                                                                                                                                                                                                                                                                                                                                                                                                                                                               |
| Dogoxin- GS F-1566-0341 - GS        | 28 |  |                                                                                                                                                                                                                                                                                                                                                                                                                                                                                                                                                                                                                                                                                                                                                                                                                                                                                                                                                                                                                                                                                                                                                                                                                                                                                                               |
| Linifanib- GS Proscillaridin - GS   | 18 |  |                                                                                                                                                                                                                                                                                                                                                                                                                                                                                                                                                                                                                                                                                                                                                                                                                                                                                                                                                                                                                                                                                                                                                                                                                                                                                                               |
| F-1566-0341 - GS Proscillaridin -GS | 27 |  |                                                                                                                                                                                                                                                                                                                                                                                                                                                                                                                                                                                                                                                                                                                                                                                                                                                                                                                                                                                                                                                                                                                                                                                                                                                                                                               |
| F-1566-0341 - GS Linifanib- GS      | 41 |  |                                                                                                                                                                                                                                                                                                                                                                                                                                                                                                                                                                                                                                                                                                                                                                                                                                                                                                                                                                                                                                                                                                                                                                                                                                                                                                               |

### 3. Supplementary python code using bioinfokit.

```
{
"cells": [
  {
    "cell_type": "code",
    "execution_count": 2,
    "metadata": {},
    "outputs": [],
    "source": [
      "from bioinfokit import analys, visuz\n",
      "import pandas as pd\n",
      "from pathlib import Path"
    ]
  },
  {
    "cell_type": "code",
    "execution_count": 3,
    "metadata": {},
    "outputs": [],
    "source": [
      "### Enter the path of your input file here ###\n",
      "input_path = r\"/home/shankar/Desktop/covid/GEO2R.GSE155241.results/gse155241.txt\"\n",
      "### Enter the path of your input file here ###"
    ]
  },
  {
    "cell_type": "code",
    "execution_count": 9,
    "metadata": {},
    "outputs": [
      {
        "name": "stdout",
        "output_type": "stream",
        "text": [
          "Volcano_gse155241.txt successfully generated at\n",
          "/home/shankar/Desktop/covid/GEO2R.GSE155241.results\n"
        ]
      }
    ],
    "source": [
      "input_path = Path(input_path)\n",
      "plot_name = \"Volcano_\"+input_path.parts[-1].strip(\".csv\")\n",
      "folder_path = input_path.parent\n",
      "#print(plot_name)\n",
      "df = pd.read_csv(input_path,sep = \"\\t\")\n",
      "#print(df[\"P.Value\"].head())\n",
      "visuz.gene_exp.volcano(df=df, lfc='logFC',
pv='P.Value',figtype='pdf',color=(\"green\",'black','blue'),dotsize=4,show = False,
ar=0,pv_thr = 0.05, lfc_thr = 0.5, axxlabel = \"logFC\", axylabel = \"P Value\", figname =
plot_name)\n",
```

```

    "print(f"{plot_name} successfully generated at {folder_path}")"
  ]
},
{
  "cell_type": "code",
  "execution_count": 10,
  "metadata": {},
  "outputs": [],
  "source": [
    "input_path = r\"/home/shankar/Desktop/covid/GEO2R.GSE155241.results/gse150316.txt\""
  ]
},
{
  "cell_type": "code",
  "execution_count": 11,
  "metadata": {},
  "outputs": [
    {
      "name": "stdout",
      "output_type": "stream",
      "text": [
        "Volcano_gse150316.txt successfully generated at
/home/shankar/Desktop/covid/GEO2R.GSE155241.results\n"
      ]
    }
  ],
  "source": [
    "input_path = Path(input_path)\n",
    "plot_name = \"Volcano_\"+input_path.parts[-1].strip(\".csv\")\n",
    "folder_path = input_path.parent\n",
    "#print(plot_name)\n",
    "df = pd.read_csv(input_path,sep = \"\\t\")\n",
    "#print(df[\"P.Value\"].head())\n",
    "viz.gene_exp.volcano(df=df, lfc='logFC',
pv='P.Value',figtype='pdf',color=(\"green\", \"black\", \"blue\"),dotsize=4,show = False,
ar=0,pv_thr = 0.05, lfc_thr = 0.5, axxlabel = \"logFC\", axylabel = \"P Value\", figname =
plot_name)\n",
    "print(f"{plot_name} successfully generated at {folder_path}")"
  ]
},
{
  "cell_type": "code",
  "execution_count": null,
  "metadata": {},
  "outputs": [],
  "source": []
}
],
"metadata": {
  "kernelspec": {
    "display_name": "Python 3",
    "language": "python",

```



```
"name": "python3"  
},  
"language_info": {  
  "codemirror_mode": {  
    "name": "ipython",  
    "version": 3  
  },  
  "file_extension": ".py",  
  "mimetype": "text/x-python",  
  "name": "python",  
  "nbconvert_exporter": "python",  
  "pygments_lexer": "ipython3",  
  "version": "3.7.6"  
}  
},  
"nbformat": 4,  
"nbformat_minor": 4  
}
```

#### 4. Supplementary Differentially expressed genes

##### GSE150316 - upregulated

gene\_symbol logFC P.Value

|               |                   |                      |
|---------------|-------------------|----------------------|
| PLVAP         | 2.62702613361235  | 1.03623906322859E-06 |
| ACKR1         | 3.74666564897533  | 1.82748584057831E-05 |
| LAG3          | 3.57886301778186  | 2.09869203044746E-05 |
| C1GALT1C1     | 1.65140489729596  | 3.11998634381925E-05 |
| CLEC3B        | 2.5640368122042   | 5.28984828021773E-05 |
| FOLR2         | 3.17570331446718  | 0.000104901020724    |
| LINC00493     | 1.95258359041048  | 0.000111984180695    |
| SNORD116-2    | 2.44917408876943  | 0.000148831663155    |
| CADM3         | 2.74929156582393  | 0.000165105749246    |
| RAMP2         | 1.87758070529686  | 0.000190298882704    |
| MUC3A         | 2.96118050673952  | 0.000204542707555    |
| HTRA3         | 1.63970199727579  | 0.000208474329469    |
| MGST2         | 1.64783031725101  | 0.000214035039344    |
| MMRN2         | 1.85668428748573  | 0.000225307973395    |
| AKAP2         | 2.32880783109264  | 0.00031926387897     |
| IGFBP6        | 2.22312544856588  | 0.000370664414874    |
| ICAM2         | 1.77823403998494  | 0.000491104134012    |
| ABCA9         | 2.30426122674453  | 0.000528267532388    |
| FXVD6         | 1.98523437061622  | 0.00058256130138     |
| RNU1-28P      | 2.76926299016039  | 0.000593226511508    |
| PSMB10        | 1.64510854481827  | 0.000608770411652    |
| ZNF321        | 1.4827521135223   | 0.00068700143122     |
| PLA2G2A       | 2.71540670145428  | 0.000712923605217    |
| HIGD2A        | 1.75998431985654  | 0.000790854867235    |
| ORF1b         | 6.52584782896435  | 0.000791378836921    |
| FBXO8         | 1.10864347078184  | 0.000809653477865    |
| THYN1         | 1.5554547747768   | 0.000812146190323    |
| TCEA3         | 2.15341505354088  | 0.000913719397671    |
| RARG          | 1.30061061961008  | 0.000953058295538    |
| HIST1H3G      | 2.99193030763847  | 0.000961230553319    |
| LAMTOR2       | 0.935270114840041 | 0.00101020842311     |
| RP11-644F5.11 | 1.68117471731561  | 0.001037582862433    |
| PFDN4         | 1.33194673043164  | 0.001050448304468    |
| SELK          | 1.14877854448654  | 0.001069518017963    |
| KIFAP3        | 0.994462235998564 | 0.001072058949498    |
| PRDX4         | 0.954634946485061 | 0.001092456839591    |
| SNAPC5        | 1.24210136725618  | 0.001092937527041    |
| HADH          | 1.91724718957099  | 0.001097346680595    |
| ORF1a         | 6.65388839231782  | 0.001123162445214    |
| NDUFA3        | 1.33638545655548  | 0.001125617615835    |
| ETFB          | 1.56090420173085  | 0.001177421222647    |
| PRICKLE4      | 1.43700231330928  | 0.001180549697248    |
| TSHZ1         | 1.49409707907521  | 0.001236937210569    |
| COX7A1        | 2.74487619931195  | 0.001335900402338    |
| HAPLN3        | 1.68089900771121  | 0.001354583322905    |
| TSPAN18       | 1.9790536549361   | 0.001367791711912    |
| TARSL2        | 1.19248168924999  | 0.001373109763131    |

|             |                   |                   |
|-------------|-------------------|-------------------|
| CPXM2       | 2.34231654457036  | 0.001418955904709 |
| HIST1H2AH   | 2.58567567837383  | 0.001432101387404 |
| UQCC2       | 1.25408079723081  | 0.001446849793608 |
| SCARNA11    | 2.88038172126474  | 0.001457480037239 |
| BMP4        | 1.69040800610386  | 0.001537588223304 |
| ARL2        | 1.14404586825443  | 0.001555626656884 |
| CD34        | 2.01517707482428  | 0.001560103751638 |
| TSHZ2       | 1.34312339477702  | 0.001590058530167 |
| AIP         | 1.36930803179186  | 0.001662988976258 |
| PDK2        | 1.5978118678933   | 0.00168975102901  |
| PDZRN3      | 2.08878218686121  | 0.001692315533535 |
| TMEM179B    | 0.99317521318903  | 0.001702763342343 |
| ITM2C       | 1.73326148790111  | 0.001728618267092 |
| FOXP2       | 1.76846133626143  | 0.00173774247128  |
| MEIS2       | 1.93552708345703  | 0.001881481851487 |
| MKKS        | 0.864640716193715 | 0.001938749129058 |
| TWF2        | 1.65745103356822  | 0.001943601107247 |
| NDUFA12     | 1.03874319127284  | 0.001955928616331 |
| JAM2        | 1.94205589955327  | 0.002039511115121 |
| SEPW1       | 1.92512897584701  | 0.002214732139609 |
| NDUFB6      | 1.61289289618209  | 0.002360110227581 |
| MRPL15      | 0.860415136484149 | 0.002378879020029 |
| SAMM50      | 0.978632815658016 | 0.002380505638533 |
| TBCC        | 1.3319430133407   | 0.00242273434927  |
| KCTD17      | 1.37773448430689  | 0.002520662515839 |
| RN7SL471P   | 1.50584074123743  | 0.002573349726232 |
| USP11       | 1.03348211045325  | 0.002600890271915 |
| SFRP1       | 2.93470105065543  | 0.002613098259159 |
| SNORD116-8  | 1.48112134005549  | 0.002622375385753 |
| NDUFA8      | 1.27986660776173  | 0.00262833067074  |
| CILP        | 2.28299508722494  | 0.002698371170262 |
| KIAA1161    | 1.6752808964474   | 0.002726814946685 |
| ATRAID      | 1.25449449571652  | 0.002762273128163 |
| COQ5        | 1.25656276014607  | 0.002781947105678 |
| THUMPD3-AS1 | 0.977499234885537 | 0.002797552882389 |
| CEP112      | 1.56276371582206  | 0.002891839485942 |
| TMEM19      | 1.13387359010931  | 0.002892074786748 |
| AL355075.1  | 1.26324648838801  | 0.002896554901791 |
| SNORD116-1  | 1.76809351807499  | 0.002998736348838 |
| C19orf53    | 0.845888813796779 | 0.003013995867479 |
| IGLV4-69    | 3.22134846040441  | 0.003111179491557 |
| SCARA5      | 1.64724633146164  | 0.003295668859172 |
| DTNA        | 1.49601604578755  | 0.003342120802914 |
| KANK1       | 1.97534925133354  | 0.003361474579263 |
| IGHV4-59    | 3.27394747315408  | 0.003376840566735 |
| ANK2        | 2.40517545709124  | 0.003386123065064 |
| ITGB1BP1    | 1.16427688676789  | 0.003425190466817 |
| ITIH5       | 1.46826259209016  | 0.00358051998119  |
| NDUFS8      | 1.19571620050824  | 0.003594032914839 |
| FANCL       | 1.21455511699174  | 0.003667858721601 |
| VAMP5       | 1.93645817991739  | 0.003697566017494 |
| MT1L        | 1.31707167908223  | 0.003731697304994 |

|               |                   |                   |
|---------------|-------------------|-------------------|
| PCBD1         | 1.49224901769815  | 0.003796546704985 |
| POLR2I        | 1.33311902667543  | 0.003839095702173 |
| TRIM69        | 1.22768708049444  | 0.004107339358219 |
| ARMCX2        | 1.42759849742789  | 0.004218758758094 |
| ITGA11        | 1.58900475000117  | 0.004254704064764 |
| RFX5          | 0.705889108122009 | 0.004254937874238 |
| CLPTM1        | 1.02025234138667  | 0.00431933035004  |
| AL139099.2    | 1.66307969854992  | 0.004424585911423 |
| C9orf3        | 0.978643742983191 | 0.004431862857341 |
| ABHD6         | 1.08866148667565  | 0.004436976109529 |
| TRIM68        | 1.14829181385085  | 0.004466405800018 |
| ZNF208        | 1.29330016214173  | 0.004521867363351 |
| CRYZ          | 1.08317449538548  | 0.00454190806283  |
| FKBP7         | 1.15918381123043  | 0.004595880442432 |
| COX7B         | 1.22548738493834  | 0.004613689214049 |
| PRDX5         | 0.921968608709316 | 0.00463208514818  |
| SLC35A4       | 1.01199232478796  | 0.004700915894914 |
| GIMAP7        | 1.12665873954639  | 0.00477795810269  |
| VPS45         | 1.03850099199308  | 0.004835688735717 |
| RFTN2         | 1.46734344979448  | 0.004854440752602 |
| KCNN3         | 1.55697367150365  | 0.004896102897672 |
| CARKD         | 1.06360855105203  | 0.004973047068075 |
| AURKAIP1      | 1.06824363525065  | 0.004976270853562 |
| PDE1C         | 1.96807990896943  | 0.004977523375906 |
| ABCB7         | 0.792735266122702 | 0.005015222179963 |
| IFI27L2       | 1.42420308513786  | 0.00510038220997  |
| MLLT3         | 0.762433766073176 | 0.005385678723916 |
| NDST1         | 0.923332053018346 | 0.005452034916779 |
| FAM13C        | 1.27970471007186  | 0.00545211696387  |
| DCHS1         | 1.44332457168258  | 0.005485086362326 |
| UQCRQ         | 1.01504054601419  | 0.005676977305352 |
| HIBCH         | 1.17222054341046  | 0.005718855120098 |
| NGFRAP1       | 0.93086486530051  | 0.005746146941987 |
| IGF2          | 2.56172075808653  | 0.00577217751799  |
| SUCLG1        | 1.10103383991208  | 0.005792924722036 |
| PLCB4         | 1.5716293682478   | 0.005843398737194 |
| NAA38         | 1.21079764153984  | 0.005862914579702 |
| RP11-588K22.2 | 1.44621414147305  | 0.005911618226637 |
| TCEB2         | 1.11363138357256  | 0.005958517272337 |
| P4HA2         | 1.5378861104144   | 0.005974802075032 |
| ITGB4         | 1.62779940253018  | 0.006030426103553 |
| CTD-2562J17.6 | 1.10990208767601  | 0.006031501399559 |
| CALHM2        | 0.862159900667979 | 0.006051430420185 |
| BANP          | 1.01954858666295  | 0.006190521674548 |
| CLEC14A       | 1.29682155793639  | 0.006197699447931 |
| PPIC          | 1.1693895434229   | 0.006209473973406 |
| MRPL46        | 0.976073660521982 | 0.006255075646803 |
| BCYRN1        | 1.45954283587346  | 0.006304751721552 |
| PPAP2A        | 1.47503500500546  | 0.006379923043148 |
| H19           | 1.99071870100233  | 0.006504974546673 |
| HIST1H2BF     | 2.06552708386627  | 0.006516506104319 |
| BPIFB1        | 3.13953498672133  | 0.006543748114458 |

|                       |                   |                   |
|-----------------------|-------------------|-------------------|
| ELP5                  | 1.36411173909701  | 0.006582803573333 |
| RABAC1                | 0.864774193068762 | 0.006864448711316 |
| JADE21.11206528567496 | 0.006962234834028 |                   |
| ZNF436                | 1.4320487303521   | 0.007014233535968 |
| IL3RA                 | 1.46007955415209  | 0.007162782496846 |
| ATP5G1                | 1.16710880000056  | 0.007423789519347 |
| CMAHP                 | 0.776892705599571 | 0.007489772083842 |
| RNA5-8SP2             | 2.64178356171982  | 0.007654680426189 |
| PCDHGB7               | 1.054448772843    | 0.007714295996678 |
| CLU                   | 1.40263327284787  | 0.007887503052662 |
| RNVU1-19              | 2.3452473553909   | 0.00821856962784  |
| UQCR10                | 0.941513644036914 | 0.008218782478351 |
| APOA1BP               | 1.26903008486455  | 0.008278239445437 |
| IGLV3-10              | 3.49026016130491  | 0.008472065768636 |
| DSP                   | 2.06342160388415  | 0.008476774152923 |
| CDC26                 | 1.42184216346165  | 0.008485241586787 |
| BET1                  | 0.956326438549282 | 0.008606665451991 |
| CPE                   | 1.11560167422961  | 0.008672024926774 |
| TADA3                 | 0.852781971804797 | 0.008719293093102 |
| CD99                  | 0.916602406272735 | 0.008778728439475 |
| PAMR1                 | 2.1001713924507   | 0.008894033618912 |
| COX14                 | 1.37579869739759  | 0.008928284836991 |
| TMEM261               | 1.10802410329028  | 0.008983636526781 |
| NUBP1                 | 1.26230424505335  | 0.008997955096338 |
| MRPS15                | 0.646598887662222 | 0.009062895044339 |
| RHOJ                  | 1.34384209132341  | 0.009107160358794 |
| ZBTB47                | 1.68385024744654  | 0.009219654645042 |
| GALNT15               | 1.65093932554479  | 0.009257445580312 |
| LOXL2                 | 1.24824212350652  | 0.009293100568572 |
| LRP5                  | 0.981544264133524 | 0.009334364221288 |
| S100A13               | 1.06751491718701  | 0.009371027071646 |
| DNM3OS                | 1.37621216907438  | 0.009416915842556 |
| PDE10A                | 1.56065185194762  | 0.009424480295023 |
| PPP2R4                | 1.04361225557242  | 0.009455706464399 |
| MAGED2                | 1.05759426572132  | 0.009516389761788 |
| TOMM5                 | 1.20163112019249  | 0.009540895338641 |
| MYL6B                 | 1.54895286412426  | 0.009588950150521 |
| VDAC2                 | 0.96407308702236  | 0.00959229772107  |
| ZNF354C               | 1.03480779446455  | 0.009720045187585 |
| ETFDH                 | 1.27865441674741  | 0.009838341025605 |
| SLC12A7               | 1.11285614417797  | 0.009873789566246 |
| IGLV3-21              | 2.80552265449912  | 0.009879441886981 |
| SNORD116-6            | 1.47188645833984  | 0.009894673029359 |
| HIST4H4               | 1.07150050518342  | 0.009980180212543 |
| SNORD116-16           | 1.46295655857693  | 0.010030556068182 |
| TEF                   | 1.33830902429716  | 0.010064828121854 |
| NUP35                 | 0.896285748820779 | 0.010186970654498 |
| MEGF8                 | 1.19937683748276  | 0.01046961631733  |
| ROMO1                 | 1.17519095988724  | 0.010493794377586 |
| IFITM1                | 1.46101549060511  | 0.010513049872289 |
| JAM3                  | 1.1342676060293   | 0.010534164128442 |
| IGLV1-47              | 2.97058838865773  | 0.010607651238347 |

LGALS3BP 1.52902860213005 0.010640346998597  
DBN1 1.02726531094779 0.01072396548688  
NDUFA9 0.96970425823163 0.010725040725103  
AMOT1.02750232563489 0.010759484379736  
DAB2IP 1.16945488360586 0.011036269415955  
NDUFAB1 1.12186881187441 0.011125782599909  
FAM171A1 1.09752744769608 0.011308626479875  
CRYAB 2.56429362401868 0.011572653067106  
HIST1H4B 1.38376980652977 0.011686209926264  
HINFP0.781185382299289 0.011821550063453  
MAPK4 1.85322378578202 0.011825546009163  
SMG8 0.833082927588781 0.011901261650132  
IDH3A 1.19249497952976 0.011993819112921  
C2orf88 1.18284491794909 0.012171239762591  
GABRE 1.64157543242256 0.012241809056451  
TIE1 1.28607098272196 0.012478646659087  
IFT20 0.899275919899791 0.012531573039905  
COX6B1 1.00802731506692 0.012584256985932  
COX7A2 0.786823475691253 0.012790451413686  
PARP30.905411602893485 0.012819111541054  
PER2 1.03639281388603 0.012934624259386  
XPNPEP2 1.7139463455096 0.012965151088428  
R3HCC1 0.952464994357506 0.013380177352675  
PGM5 2.31866115645309 0.013382787373742  
BVES 1.74747735418489 0.013400965126655  
HIST1H2AL 1.61440332790196 0.013570695704358  
HIST1H2BI 1.95530831880713 0.013587810525418  
RILPL1 1.42873359094857 0.013602324387464  
MMAB 1.19293927205216 0.013742591362115  
RNA5-8S5 1.40376514223057 0.013755409249442  
NDUFB7 1.18583206343636 0.013782283321523  
SNORA35 2.08038665269563 0.013807561860401  
MOB2 1.07373619928912 0.01396336767934  
UQCR11 1.15811236923855 0.014001350379753  
HDAC9 1.36050004507615 0.014017429734096  
TRIM2 1.37151255056783 0.01412857049272  
HS1BP3 0.84305298573391 0.014145544437856  
CTSF 1.5152964247877 0.014227742849107  
ASAP3 1.04403220331941 0.0143215001401  
CCDC77 1.02654025924734 0.014356492458066  
RAMP3 2.03089793647041 0.014359216955787  
FKBP2 0.850733401552685 0.014478648896166  
AR 1.24662502660708 0.014578269969721  
SEPT1 1.52274686561412 0.014578502661998  
CKB 2.11311922678248 0.014644632234613  
SNRNP25 1.281922252587 0.014789313935834  
C10orf32 0.980137749898905 0.014848133273168  
DLG3 1.03084018572225 0.014854426137412  
TEX264 0.960615336683849 0.014936498291583  
MDM1 0.856440619829444 0.014947595777332  
NPR1 1.23771395936151 0.015155017411904  
PUS3 0.892608099969548 0.015277639506246

|           |                   |                   |
|-----------|-------------------|-------------------|
| ITPK1     | 1.04737986133895  | 0.015371371518979 |
| SCCPDH    | 0.83111063705847  | 0.015506261872705 |
| MRPS23    | 1.05002971068722  | 0.015514582992838 |
| EPHA4     | 1.38222535045725  | 0.015528422543162 |
| HIST1H3C  | 2.37136539931699  | 0.015594128248106 |
| MITF      | 1.28871874731528  | 0.015698229237585 |
| CXorf36   | 1.71798405713199  | 0.015717551472184 |
| C14orf159 | 0.784318113250072 | 0.015789063873927 |
| UBL7      | 0.900672058528196 | 0.015916774747175 |
| CFD       | 1.10913092591052  | 0.015951732222451 |
| GATB      | 1.23299590128198  | 0.015973779863678 |
| PLEKHO1   | 0.891983854975566 | 0.015984560542618 |
| TRAFD1    | 0.729770649306126 | 0.016007469527297 |
| UBE2I     | 0.765742914278555 | 0.016016600064672 |
| APIP      | 1.02581155363388  | 0.016018380952167 |
| MAGOH     | 0.953299345004074 | 0.016365954370886 |
| HTRA1     | 1.43021169844403  | 0.016377693400595 |
| RNU6ATAC  | 1.85128031862397  | 0.016410216657824 |
| ZNF252P   | 0.859788831535721 | 0.016588145345289 |
| ZFYVE19   | 1.03739234849808  | 0.016722617763188 |
| MS4A15    | 2.21329816400136  | 0.016741002191156 |
| MUL1      | 1.10482753202012  | 0.016886857003934 |
| NBR2      | 1.71259599449516  | 0.017008014124345 |
| HIST1H4I  | 1.42750760056711  | 0.017245302144641 |
| ATP5I     | 0.982901758925352 | 0.01741798182372  |
| PIK3C2B   | 1.07286543540502  | 0.017514532610702 |
| EPHX1     | 1.10859872420665  | 0.017564439016381 |
| GFRA1     | 2.00866953572888  | 0.017614249833201 |
| GPRASP1   | 1.53174477414915  | 0.017650480856206 |
| NDUFS5    | 0.963577341912586 | 0.017859851949603 |
| MAP2K7    | 0.811175772729339 | 0.017939504987028 |
| IGHV1-46  | 3.01235338588808  | 0.01804116327402  |
| FAM96B    | 1.12879667277776  | 0.018122807892528 |
| COMMD1    | 0.926608329613263 | 0.018172257792174 |
| RBM42     | 0.907817937980018 | 0.018240645754782 |
| MRPL2     | 0.943960938434813 | 0.018252927651129 |
| ITPA      | 1.29498182903385  | 0.018278848270897 |
| YIPF3     | 0.66910657926379  | 0.018365403328866 |
| EXOC7     | 0.656232445722209 | 0.018563093890263 |
| NDUFA4    | 1.26422471048386  | 0.018765292652479 |
| LGALS1    | 0.730287304699782 | 0.01879386623333  |
| UBBP4     | 1.39268140122841  | 0.018799133744172 |
| LYRM5     | 1.12939286640848  | 0.018805444726294 |
| CAP2      | 1.92304281186892  | 0.018809576277857 |
| PDZD2     | 1.52929282549596  | 0.018830895457595 |
| NUTF2     | 0.740093729698485 | 0.018998210546953 |
| RAI2      | 1.30080820325546  | 0.019120182116569 |
| PIP4K2B   | 0.746442151918672 | 0.019129383887859 |
| SNX7      | 0.866710451224869 | 0.01935614870535  |
| NOMO2     | 0.811787971410819 | 0.019417578880218 |
| COMMD6    | 0.786949851906349 | 0.019474494911207 |
| ZNF181    | 1.09682583329222  | 0.019492142119208 |

|             |                   |                   |
|-------------|-------------------|-------------------|
| OSBPL10     | 0.758787781524342 | 0.019680600103027 |
| FBXO31      | 1.05140318842164  | 0.019987133188483 |
| SUCLA2      | 0.83837555540639  | 0.019992675379859 |
| SOD1        | 0.952902053831664 | 0.020028648566911 |
| TOM1L2      | 1.25242240134979  | 0.020199610171789 |
| SLC9A9      | 1.01892466218946  | 0.020354607886877 |
| NFKB2       | 0.801136402273911 | 0.020374443906685 |
| NDUFB2      | 1.1075699397737   | 0.020389092689244 |
| MAPK10      | 1.39172477159328  | 0.020406848025676 |
| TNFAIP8L1   | 1.20107006434118  | 0.020441274104872 |
| SNORA5A     | 1.85341845294847  | 0.020554465716211 |
| SEMA6A      | 0.963748947742921 | 0.020678232370337 |
| OST4        | 0.711595193313423 | 0.020816120652198 |
| AMZ2        | 0.837292366016403 | 0.02081937419618  |
| CD99L2      | 0.92357575564455  | 0.020870228585653 |
| RNF216P1    | 0.924046990881785 | 0.0209582563493   |
| TMTC1       | 1.33892093228453  | 0.021010290640011 |
| PLOD1       | 1.16111942325776  | 0.021069371278467 |
| FAM107A     | 1.70820635267935  | 0.021153006764041 |
| ASCC1       | 0.623061273175698 | 0.021210311083476 |
| ANGPTL2     | 1.16379174082224  | 0.021230406844845 |
| GPR75-ASB3  | 0.733184178822322 | 0.021265865558565 |
| ANKMY2      | 0.776287694436383 | 0.021335378647738 |
| ASNA1       | 0.733728504101649 | 0.02160313583129  |
| MTFR1L      | 1.43959865076926  | 0.02166782278164  |
| WFS1        | 1.01895646440592  | 0.021835815690222 |
| TMOD2       | 0.97922452457308  | 0.021930742713002 |
| IGLV3-25    | 2.72247475146572  | 0.021967959677634 |
| MIR4458HG   | 1.55329176902062  | 0.022004934920885 |
| PLCXD3      | 1.67993121997095  | 0.022086352350893 |
| VWA1        | 1.34964045582735  | 0.022129577054015 |
| NUPR1       | 1.19426300841227  | 0.022268141670703 |
| PPP1R16B    | 1.05631099129327  | 0.022336409568609 |
| CGNL1       | 1.1233467947148   | 0.022486258379552 |
| PHB         | 1.04551910382375  | 0.02258896536949  |
| MRPL40      | 0.768626937378214 | 0.023183230916093 |
| RP11-37B2.1 | 1.05681882619976  | 0.023192396049672 |
| NCALD       | 1.20337979486626  | 0.023301424738731 |
| HSPB8       | 1.52897352529292  | 0.023320506529598 |
| IFI35       | 1.1163583566181   | 0.023423275049086 |
| HIST1H2BB   | 1.95869891819499  | 0.02352587383851  |
| HSPB1       | 1.60931566842079  | 0.023527419065954 |
| LMAN2L      | 1.14836399970673  | 0.023767850606007 |
| MINA        | 1.00608271039919  | 0.02379199706508  |
| FAM120C     | 0.844245028208033 | 0.023813376565957 |
| MAF1        | 1.05079945578761  | 0.023826089024475 |
| LSM4        | 0.758173561169813 | 0.023951934678647 |
| GAS8        | 0.923762931488029 | 0.024206094498857 |
| GPRC5B      | 1.55615771897964  | 0.024271075472072 |
| NDUFB10     | 1.0167376852959   | 0.02432218272339  |
| ACACB       | 1.45456942639247  | 0.024362683006986 |
| UCHL1       | 1.72469014393439  | 0.024404079986976 |



|                       |                                     |
|-----------------------|-------------------------------------|
| MT-TP1.96304151661361 | 0.02441910996126                    |
| BCAM1.49653947192748  | 0.02445254789432                    |
| SPOCK1                | 1.8649083528954 0.024463229302961   |
| PREX2                 | 1.04234305825158 0.024469649139124  |
| CDKN2AIPNL            | 1.02969016386251 0.024507378495558  |
| MRPS7                 | 0.997040820474886 0.02452269912806  |
| ARRB1                 | 0.718362421202532 0.024647808176353 |
| NOSTRIN               | 1.04050146638147 0.024795422843285  |
| RNU1-89P              | 1.87245318947062 0.024955728481749  |
| PSMB3                 | 0.700432889933193 0.025178670264294 |
| SNORA79               | 1.14421054060561 0.025260056099313  |
| TRIM16                | 1.19799251820386 0.025266214362765  |
| CD27-AS1              | 0.756276610363133 0.025311308116571 |
| IGHV3-21              | 2.22342804835049 0.025326735141259  |
| HSPG2                 | 1.46618695085253 0.025397227417789  |
| MIEN1                 | 0.721770049839192 0.025815030865723 |
| PCDH12                | 1.16281089440744 0.025883531351535  |
| MTRNR2L8              | 1.72509560545185 0.025902195769579  |
| DHX8                  | 0.671286071055611 0.026095662495792 |
| ANAPC13               | 0.816989658129867 0.026134074801671 |
| ABCA10                | 1.1324031514469 0.02623567922278    |
| COX5B                 | 1.02259640619696 0.026572276392594  |
| AASS                  | 0.725836579756302 0.026583833905798 |
| EHMT2                 | 0.74897046643809 0.026630487278564  |
| TSPYL4                | 1.06371146854738 0.026643353046586  |
| FDX1                  | 0.800815712572355 0.026692734518481 |
| IDH3G                 | 0.736189953683353 0.026702405735303 |
| VEGFC                 | 1.03733992267464 0.02672888564877   |
| PCYOX1                | 1.10051280752985 0.026746919104156  |
| PIN1                  | 0.787881530901308 0.026848785751117 |
| NNT-AS1               | 0.668717030735257 0.026854449014475 |
| RPF1                  | 0.782619333628775 0.026856029650967 |
| CCDC101               | 0.826336147879745 0.02691450154108  |
| PER3                  | 1.10943214990591 0.026940154335616  |
| RRAS                  | 0.73028859605243 0.027059869880765  |
| NMT1                  | 0.582803429529806 0.027107011020212 |
| IGHV5-51              | 2.42414892761853 0.027270517278954  |
| NDUFB4                | 0.829750436710335 0.027379676146822 |
| KEAP1                 | 0.946539820171315 0.02740780702668  |
| ANAPC10               | 0.983374433733159 0.027467752574014 |
| TMEM147               | 0.998242064107922 0.02748228771773  |
| C15orf52              | 1.51028610174206 0.027508611644718  |
| RBM10                 | 1.0318419961159 0.027738984732131   |
| CST3                  | 1.11141185034377 0.027751908079369  |
| HMOX2                 | 0.871969330822181 0.028094109367606 |
| ING4                  | 0.809822442648277 0.028100375432898 |
| EVC                   | 0.892046303121828 0.028110648378188 |
| SGCA                  | 1.60773260504675 0.028151981533702  |
| URGCP                 | 0.804266272266285 0.028201666532117 |
| MMP15                 | 1.39326355141246 0.028349506099777  |
| NUDCD3                | 0.789860812303465 0.028508778228098 |
| GIMAP4                | 0.989413193537984 0.028511557035811 |

USF1 0.560893329904616 0.028546932605245  
SDF4 0.764360183993274 0.028841952837366  
LRIG1 1.20962485436922 0.029036192018785  
C15orf41 1.17619128621471 0.029068491279385  
BBS9 0.65972598534071 0.029435821427052  
BBS100.952197132997132 0.02952978722385  
CLPP 0.767487219751378 0.029605623282769  
INPP5K 0.810478777185621 0.02986526624173  
GIMAP6 0.875484865811672 0.030122278400179  
MZB1 2.52466932387754 0.030132342392744  
CD1510.983827184144266 0.030215587104727  
PHLDB1 0.913656727494651 0.030261146368224  
AP4B10.9229267306893 0.030385446309281  
PTGFRN 1.40412959812039 0.03080380366732  
ASAP2 0.736668698550595 0.030864464153444  
JUP 1.31414424359029 0.030935889110884  
TTC230.842849572193834 0.030966329770501  
ZDBF2 0.670271518678619 0.031109635489453  
ERAL1 0.687577486582947 0.031193523922496  
GTF3C3 0.666249953725567 0.03125775242671  
NDUFC1 0.734613339002705 0.031460835349403  
ACOT7 1.07529368047422 0.031500313527287  
ID3 0.875563857441573 0.031594906384328  
DPYSL3 1.72218328779331 0.031678582359627  
PALMD 1.09857247897039 0.031700481220507  
PHYH 0.854989396171082 0.031768142177948  
NUDC 0.794972898295261 0.031796399698013  
FRMD3 1.09908748422895 0.03179652351211  
NDUFA6 0.773647140601469 0.031817906116464  
NDUFB1 0.721438262568207 0.031826928386227  
HDAC5 1.0697264509176 0.031891324149311  
ABCA6 1.04914370570798 0.03204160129339  
SLIRP 0.686887423066733 0.032043365730349  
CETN3 0.82877956273799 0.032283878745739  
RNU1-134P 1.40135042245014 0.032377818994628  
DLGAP4 0.660915886718372 0.032406135502875  
PCGF2 0.93422228115831 0.032427375036908  
DCTN2 0.672102101767707 0.032752774433681  
C19orf12 0.870299552830215 0.032936026716658  
ZC3H4 0.690953659608617 0.032989120981832  
SLC1A4 0.906999333394563 0.033075760035491  
METTL13 0.824062488792258 0.033107106804319  
CNPY4 0.704842734145961 0.033409803643771  
EXOC6B 0.796961440707035 0.033436871695349  
MMADHC 0.591417866771234 0.033513001893524  
TPD52L1 1.44848896447876 0.033521515595773  
SYNC 1.2454874296099 0.033591488621965  
IGHG4 2.1592052767222 0.033747362872373  
PRKCA 0.861253737714921 0.033824113472895  
IGFBP4 0.894125034748654 0.034101679645895  
SYT110.793163150932669 0.034119129490161  
IGLL5 2.38844467020515 0.034141311025093

|                        |                   |                   |
|------------------------|-------------------|-------------------|
| MDK                    | 1.55998554096556  | 0.034255122809667 |
| FGD6                   | 1.03726351559182  | 0.034270203454585 |
| NFS1                   | 1.02423833132684  | 0.034288577816178 |
| SCAPER                 | 0.753102258430983 | 0.034316218294315 |
| POLR2J                 | 0.825275944845643 | 0.034356385606571 |
| BST2                   | 1.06156089732132  | 0.034468898494372 |
| IGHV4-34               | 3.13374499798114  | 0.034490302061631 |
| LENG1                  | 0.703139023344769 | 0.034584299558121 |
| HINT10.510049625786398 | 0.034604061554172 |                   |
| ZFYVE9                 | 0.838998496920232 | 0.034703988434766 |
| FAM195B                | 0.857776733144436 | 0.035113436493306 |
| Metazoa_SRP            | 0.913766503782085 | 0.035238584551625 |
| RRAGB                  | 0.824280039373138 | 0.035242764323174 |
| RNASEH2C               | 0.626380522634371 | 0.035539695582195 |
| APOL4                  | 1.61536589277272  | 0.035615178247403 |
| ZNF271P                | 0.798324850801376 | 0.035634351890262 |
| CLTB                   | 0.84771753431631  | 0.035635060882855 |
| ABCA8                  | 1.31740253843311  | 0.035687510036613 |
| TMEM101                | 0.722624927577717 | 0.03616546658088  |
| C1orf115               | 1.30981392598166  | 0.036276289935474 |
| ENG                    | 0.964860189124001 | 0.036426542652353 |
| SLC25A20               | 0.770071189345224 | 0.036502068665546 |
| DIXDC1                 | 1.26610863763203  | 0.036556931569627 |
| LARP6                  | 1.50362606081646  | 0.036577929810127 |
| SELP                   | 1.21407522531557  | 0.036605826348792 |
| FHOD3                  | 2.1614390392496   | 0.036635073531792 |
| MDH10.914029076542233  | 0.036715683064182 |                   |
| CYC1                   | 1.10158652578896  | 0.037285256286725 |
| HIST1H2AJ              | 1.92598476035305  | 0.037323007899845 |
| CRIP2                  | 1.21860439050226  | 0.037378120861829 |
| PHF140.733642316768309 | 0.037521117736876 |                   |
| CHPF                   | 1.02308957668198  | 0.037635758271758 |
| ACADM                  | 0.731727263967819 | 0.037735715425625 |
| NOD1                   | 0.759813404064337 | 0.037778987861187 |
| GRK5                   | 0.965469694758284 | 0.037794576440501 |
| FBXO32                 | 1.86857747949063  | 0.037800642499957 |
| MYOM1                  | 2.28938553916214  | 0.037809748512595 |
| TEAD2                  | 1.13003835883198  | 0.037996029094852 |
| CUEDC2                 | 0.860221643548019 | 0.038144288651241 |
| MTHFR                  | 0.787583681693372 | 0.038238752508251 |
| IDO1                   | 2.89609676883334  | 0.038288455364949 |
| FAM213A                | 1.13537098657925  | 0.038324279854703 |
| C9orf64                | 1.19253273228015  | 0.038338487701929 |
| ITGA90.95311196470026  | 0.038393334947758 |                   |
| TSPAN12                | 1.10252191171555  | 0.038469028517835 |
| LPIN1                  | 0.786922770547257 | 0.038516204840084 |
| PRMT2                  | 0.600696273925543 | 0.038630922473872 |
| IGBP1                  | 0.577596948657479 | 0.038648376843946 |
| CEP104                 | 0.57491156126583  | 0.038711541257078 |
| COA5                   | 0.836296045566416 | 0.038797426624148 |
| ING3                   | 0.78537023753511  | 0.038800231930718 |
| GPR155                 | 1.14363649028394  | 0.038935476967689 |

RALGPS2 0.943327119105676 0.039063990161983  
PMVK1.0094378320087 0.039131157555198  
ANGPTL1 1.34199717615295 0.03914440759472  
NUDT9 0.923933314846786 0.039352466167125  
TACC2 1.50772494575913 0.039393709120659  
CXCL9 3.22461990487493 0.039495683843959  
SGCB 0.867679172376512 0.039632626714224  
KLF120.744457326204384 0.039776207978137  
ZNF920.944767303604986 0.039883256227011  
PVRL3 0.81503762365405 0.040146604700111  
EMC7 0.61990001751917 0.040209090323732  
OLFML1 1.05230767609552 0.04022153004427  
MPDZ 1.17343337622565 0.040250440343856  
TP53BP1 0.630802493893477 0.040330606188243  
CCDC149 0.879669415922514 0.040572679997623  
CPVL 1.13183965413179 0.040574545186215  
QDPR 0.622901564025608 0.040638548774822  
PSPH 0.90366165829783 0.040825301325993  
SEPHS1 0.818112213720582 0.040977248713945  
EBF1 0.848953465029235 0.041062033752511  
PRIMPOL 0.613186541546622 0.041326914714373  
SNORA63 1.61240955460318 0.041343268728481  
HERC2P3 0.813752760749133 0.041426745539101  
TMEM9 0.675496353386362 0.041528212053152  
NDUFS4 0.651467544393023 0.041575500661833  
LARGE 1.51282979706416 0.041679889278587  
PIK3CG 1.21003286972584 0.041838571772022  
KIT 1.37051835885466 0.041857331314944  
CHID10.703093147235601 0.041875584106904  
RUNX1T1 1.30711950883203 0.04194308429849  
PSMD4 0.585206795231093 0.04196583651523  
ACOT9 0.643467746213931 0.042484960329608  
MRPL9 0.714184584633229 0.042608466392813  
HSP90AA2P 1.57297326061608 0.042713538639958  
PLEKHG5 1.10937892998224 0.043020230133264  
GPR137 0.63397655752699 0.043035313096217  
ZNF204P 0.833087204347238 0.043046059322158  
PHLDB3 0.872590423671449 0.043073116811395  
ABTB2 1.15458958209876 0.043117270812902  
VANGL1 0.777666501927017 0.043214589201901  
DRG1 0.5207452353976 0.043217946289943  
ABCF3 0.731610753520707 0.043255149702559  
IGHV1-18 2.38409498849451 0.043255286114142  
TTC5 0.759016005523924 0.0436281650835  
ISLR 1.01794444820858 0.043858529261884  
ABHD10 0.684807878970731 0.043921881694758  
RNU1-21P 1.58759601548946 0.04393397923189  
PCLO 1.02939540087255 0.043992409094751  
SF3B5 0.685795616247459 0.044068952971011  
AKIRIN1 1.13117427994402 0.044116372163144  
TBC1D4 1.02614836072851 0.044242714451335  
SNORD116-24 1.16386088833945 0.044267338014101

|          |                   |                   |
|----------|-------------------|-------------------|
| ARHGEF15 | 1.3565353748778   | 0.044465483207321 |
| FILIP11  | 1.24145207623349  | 0.044541392167797 |
| PMPCA    | 0.784716001774263 | 0.044606285548348 |
| MRPL24   | 0.836953527981412 | 0.044621622866585 |
| LIMS21   | 1.48690786815884  | 0.044663101720157 |
| APLF     | 1.00564136387878  | 0.044675328482248 |
| CCDC127  | 0.786138919534127 | 0.044847904532649 |
| RBCK1    | 0.719472666256777 | 0.044940867732078 |
| IGKV3-15 | 1.82243618561422  | 0.044949304147919 |
| MRPL10   | 0.755510344076665 | 0.044988886690655 |
| PRICKLE2 | 1.10383488975057  | 0.045162297921898 |
| ASS1     | 1.21105480538363  | 0.045339411579409 |
| BCAP31   | 0.56061329136518  | 0.045419745770767 |
| FAM26E   | 0.855276968132779 | 0.045498220436771 |
| CDR1     | 0.891694802443481 | 0.0456040688493   |
| PLCE11   | 1.15088474397752  | 0.045646528497219 |
| HAX1     | 0.737230205757504 | 0.045652063931675 |
| GPT2     | 0.888736909323232 | 0.045723258855959 |
| CRIP1    | 0.855741936333981 | 0.045750382050884 |
| PLCD3    | 1.32481043250513  | 0.045900998794319 |
| PLEKHA7  | 0.832469495132487 | 0.045949416100486 |
| ECSCR    | 0.939060930968941 | 0.046037567250949 |
| CAMTA1   | 0.624039077445631 | 0.046044666587566 |
| C4B      | 1.06983034382245  | 0.046046726090977 |
| ITSN1    | 0.52067324953425  | 0.046061076815642 |
| TMEM109  | 0.671467686885261 | 0.04634670159389  |
| TCEB1    | 0.714649203628731 | 0.046498394418275 |
| DUT      | 0.571364419537328 | 0.046750030379438 |
| IGLV2-23 | 2.4404588668285   | 0.046933373284105 |
| ECHS1    | 0.836620889512602 | 0.046950348103224 |
| LRRC20   | 1.58960696627459  | 0.047111692047054 |
| RASSF4   | 0.719980331034465 | 0.047129744149661 |
| PCOLCE2  | 1.32942520314411  | 0.047140182716157 |
| NFU1     | 0.715870537435629 | 0.047316372777318 |
| TBC1D13  | 1.08092535745673  | 0.047418658367132 |
| POLR2L   | 0.847780349597831 | 0.047455319633638 |
| AVEN     | 0.863746367273905 | 0.047461814180803 |
| PBXIP1   | 0.730765720930402 | 0.047559180891227 |
| SNRPD2   | 0.828377862714079 | 0.047681529105621 |
| ZNF521   | 0.782846730899827 | 0.047753007688003 |
| DNAJC15  | 0.548794336702051 | 0.047818756751265 |
| PLIN4    | 2.14686718829385  | 0.047837460243607 |
| SGCE     | 1.02417220448296  | 0.048056035588248 |
| NDUFB11  | 1.04822621149025  | 0.048100099053454 |
| FAM63A   | 1.10639270453329  | 0.048317953250482 |
| IGHV3-33 | 2.45049559916729  | 0.048335460696975 |
| WBP1L    | 0.559744110106664 | 0.048397926048091 |
| RNH1     | 0.68307315804623  | 0.048551106051449 |
| CACNA1C  | 1.48487025283062  | 0.048791571174701 |
| RNF216   | 0.500272825221294 | 0.048891593392035 |
| RNVU1-10 | 1.48874241978667  | 0.049043899834635 |
| NIPAL3   | 0.685242220101028 | 0.049102157743172 |

|         |                   |                   |
|---------|-------------------|-------------------|
| CAPNS1  | 0.536216752524404 | 0.049117643719576 |
| EIF3G   | 0.521746012564379 | 0.049145570970587 |
| EHD3    | 1.1489888983896   | 0.049261073611596 |
| RNF150  | 1.82964254614818  | 0.04935524007362  |
| PRCC    | 0.683831442216535 | 0.049439677341351 |
| EIF3K   | 0.770999858549397 | 0.049494922312546 |
| PCDHGA6 | 0.996743904500637 | 0.049594702703646 |

### Downregulated

**gene\_symbol logFC P.Value**

|               |                    |                   |
|---------------|--------------------|-------------------|
| MTHFD1L       | -0.995588795500916 | 0.049891276509548 |
| SLC35E3       | -0.723427002471635 | 0.049722853242674 |
| RBM12         | -0.675468840268023 | 0.049141474019758 |
| PLEK          | -1.24191955641856  | 0.048851252322266 |
| METTL9        | -0.559323718166655 | 0.048826061361431 |
| BTAF1         | -0.684829231087528 | 0.048753543984871 |
| SORL1         | -1.08680555457527  | 0.048382434354937 |
| MYBBP1A       | -0.652179613350711 | 0.048382120638298 |
| ATG3          | -0.621501378428561 | 0.048156044955424 |
| RQCD1         | -0.584685558935794 | 0.04811589204463  |
| WHSC1L1       | -0.630395003739651 | 0.048075965457121 |
| SLC23A2       | -0.703598438855762 | 0.047849422557967 |
| CCDC59        | -0.675139200732064 | 0.047497359640483 |
| PPIP5K2       | -0.637644572065183 | 0.047258843597425 |
| SPI1          | -1.39474323027782  | 0.047216776333995 |
| RAB1A         | -0.759639839339181 | 0.047215995419927 |
| USP15         | -0.786788616974627 | 0.047190447455434 |
| SEC22B        | -0.549665183304579 | 0.047088543366785 |
| GDAP2         | -0.689501815689805 | 0.046692296531126 |
| RAB31         | -1.16247895563701  | 0.046686112157943 |
| SLC39A8       | -1.48713850478261  | 0.046608828267    |
| ZFP36L2       | -0.818168033997091 | 0.046494857850749 |
| ROCK1         | -0.556928927195311 | 0.046450723563927 |
| KLHL9         | -0.537694055361669 | 0.046409005801263 |
| RORA          | -0.661465366123389 | 0.046364254534318 |
| HBB           | -2.56665261225656  | 0.046318341427933 |
| MARK3         | -0.71835361167676  | 0.04613857368436  |
| CDC42BPG      | -1.68032572820665  | 0.045824227975487 |
| GAS6-AS1      | -0.740674169997477 | 0.045783465806761 |
| DLEU1         | -0.829212336449597 | 0.045654281170015 |
| CCDC88A       | -0.68118229846256  | 0.04551155218388  |
| ATP6V0B       | -0.630721490870796 | 0.045485402662351 |
| RP11-405O10.2 | -0.896632507915135 | 0.045376246798244 |
| CEBPB         | -1.01383457370974  | 0.045139706314858 |
| CCDC186       | -0.574041889531699 | 0.045105736734765 |
| IMPDH2        | -0.769317300677721 | 0.04498572936316  |
| FBXW2         | -0.559368168132571 | 0.044860624708143 |
| TNFRSF11B     | -1.43174575032816  | 0.044838274475289 |
| CXCR4         | -1.6936179722046   | 0.044790960747474 |
| TRIM58        | -1.18067524804123  | 0.044685790055526 |
| LRRC58        | -0.737238817093906 | 0.044235864456409 |
| RP11-342K2.1  | -0.963926749167964 | 0.044163377652761 |

DESI2 -0.716831180996523 0.044160807141449  
ZBTB37 -0.554422584546326 0.043978200428098  
TET2 -0.681027752314909 0.043977378495101  
IL1RAP -0.887769711126212 0.043915873322981  
TMEM55B -0.823398990949944 0.043822691135163  
LPGAT1 -0.691057852145774 0.043685049067198  
CYTH1 -0.70231536034771 0.043649146496169  
RAP1B -0.774381004648362 0.043468671714948  
TNFAIP8L3 -0.928574086783507 0.043326866382442  
PPARG -0.975875661596081 0.043090902106048  
TFCP2L1 -1.99525081779186 0.042922965419633  
NPM1 -0.757312705252591 0.04288691709959  
CRLF3 -0.671484604193503 0.042794287325318  
KDM7A -0.732285411980739 0.042561501007653  
DGKA -1.0927926018397 0.04253647219114  
RCOR3 -0.514995510429288 0.042474167650306  
RP4-671O14.6 -0.776599421032934 0.042394077927653  
SP3 -0.636747202247716 0.042158522862054  
ATP6V0A2 -0.581116101686002 0.042143074175456  
TAF1D -0.620718991639101 0.041536764607606  
TMX3 -0.633008274009091 0.041437139943639  
ZNF451 -0.670099220268372 0.04143120983984  
AGPAT5 -0.784647850377296 0.041415400980973  
GK5 -0.7261276726299 0.041256663162721  
AP000347.2 -0.876526844606666 0.041229664383676  
CHPF2 -0.77390050478333 0.041190220047008  
UBLCP1 -0.981836075434002 0.041166890091833  
TMEM167B -0.628877607838574 0.041137984506353  
EGLN2 -0.647884680267275 0.040865575753962  
H1F0 -0.850346293751398 0.040653822303737  
BCL6 -0.993390458555578 0.040631365035719  
ZNF254 -0.55537970171655 0.040405177845637  
HCK -1.69633972255378 0.040300985711702  
OGG1 -0.806934522425971 0.040275683432581  
MAP3K8 -0.805557619124119 0.040268701164858  
CBX5 -0.729909764815188 0.040141366890991  
DENND4A -0.741444787083853 0.040108941540117  
IREB2 -0.614971155897108 0.040100511821905  
ZFAS1 -1.07274480284901 0.039277817007562  
CAPZA1 -0.986119699060812 0.039039013357257  
NFKBIZ -0.794925057072357 0.038914955576491  
GABBR1 -0.592281529269273 0.038596792534693  
TXNRD2 -1.24281672634514 0.038258116835764  
MTMR6 -0.776105707293027 0.038186381500565  
PAXBP1 -0.794842452321627 0.03805275316984  
E2F3 -0.622964711092951 0.037705270168497  
NUP107 -0.684721199408537 0.037685852663726  
ANKRD13D -0.921362385036105 0.037679135264386  
EMD -0.771870189243501 0.037654023813964  
STXBP4 -0.702746283699406 0.037619107456587  
PLCD1 -0.743629606918681 0.037569405251241  
SLA -1.17755823586664 0.037523083907179

|              |                    |                   |
|--------------|--------------------|-------------------|
| KCNE1        | -1.5168692679982   | 0.037335188652662 |
| SLC44A1      | -0.882419819089587 | 0.037222226315761 |
| LETMD1       | -0.613966922099524 | 0.036959959757277 |
| SPTY2D1      | -0.699893395376677 | 0.036826296518825 |
| MROH1        | -0.828586110916421 | 0.036804967286102 |
| TRA2B        | -0.801534526516415 | 0.03680063422163  |
| UBXN2B       | -0.944300337874338 | 0.036620743427449 |
| TMEM165      | -0.676463799039071 | 0.036609909427631 |
| TP53INP1     | -0.671613305578776 | 0.036563843195584 |
| FAM76A       | -0.829768556968204 | 0.036315057561693 |
| CISH         | -1.06835044192411  | 0.03629640079317  |
| NUS1         | -0.703541768547912 | 0.036142549644923 |
| CPNE3        | -0.58281163921131  | 0.03613218029728  |
| POLM         | -0.865948331403883 | 0.036082882082078 |
| VPS37A       | -0.634353382522241 | 0.036024563234407 |
| RGS16        | -1.24818965755211  | 0.036004804172631 |
| SLC35D1      | -0.611173675395426 | 0.035858373497209 |
| RP11-53O19.3 | -0.932942373061028 | 0.035798468337443 |
| CACNA1D      | -1.53994590482347  | 0.035750264695533 |
| ZYX          | -0.801911312917201 | 0.035713384739293 |
| CLCN5        | -0.846449241531056 | 0.035490944800751 |
| PTPN18       | -0.786690942124049 | 0.035433528616089 |
| RNF126       | -1.18701157020438  | 0.03499938916392  |
| LDLRAD3      | -1.12295519306705  | 0.034921850119271 |
| ARRDC3       | -0.919630989677445 | 0.034820062881914 |
| CCNG1        | -0.878712814644265 | 0.03479979368125  |
| ZNF518A      | -0.559564858181877 | 0.034654347249198 |
| C22orf34     | -1.02405363376942  | 0.034573944711997 |
| HBA2         | -1.80345264131336  | 0.034553084710162 |
| HSPBAP1      | -0.680049350719582 | 0.034513003348654 |
| GBE1         | -0.788171107386107 | 0.034422307505904 |
| ERBB2IP      | -0.786376398504966 | 0.034358779082886 |
| MICAL1       | -0.92804932144184  | 0.033854696385908 |
| ASXL2        | -0.681727892087539 | 0.033723868953502 |
| ATP7A        | -0.709847875735635 | 0.033603095180071 |
| TVP23B       | -0.713714377129514 | 0.033544149914541 |
| MYO1G        | -1.50189819241214  | 0.033321943554598 |
| IER3         | -1.38266390312934  | 0.033321107829484 |
| CHD1L        | -0.79018579446285  | 0.033233540371195 |
| SLK          | -0.547327110621149 | 0.033172289390311 |
| TP53BP2      | -0.624324137633992 | 0.032935682309664 |
| ADAM9        | -0.89976736499615  | 0.032796939715022 |
| THOC1        | -0.575048288516101 | 0.032736058486775 |
| ZFAND6       | -0.762984510150424 | 0.032733545429897 |
| QSOX2        | -1.09843794142504  | 0.032613618764888 |
| PABPC1       | -0.927540901245207 | 0.032542946414865 |
| THAP9-AS1    | -1.24931629090483  | 0.032408782106208 |
| CSF2RA       | -1.37146542622719  | 0.032294038102804 |
| BCAT1        | -1.33580451812495  | 0.032281092868309 |
| LARP1B       | -0.60044328323378  | 0.032089369377965 |
| SLC35F5      | -0.787331632993426 | 0.031961790923932 |
| AMMECR1      | -1.34936594853686  | 0.03190351240644  |



MAN1B1 -0.675355067330179 0.031805499989601  
ZNF207 -0.644190959824671 0.031795236493689  
PRG4 -1.83137893593722 0.031366632421221  
RGS1 -1.84570131750027 0.031245677581832  
CREBZF -0.693475985017088 0.031138954998924  
SGK1 -1.16925629343453 0.031095591596574  
INHBA -1.03449556620105 0.030882987253511  
GTPBP2 -0.861692092861238 0.030740608920567  
RCN2 -0.891292952724523 0.030593588342934  
NRCAM -1.8274442764255 0.030302749255011  
RP11-53B2.2 -1.03264420726057 0.030225407542266  
ZMYM2 -0.697270166326698 0.030182293443808  
TP73-AS1 -0.909797801811266 0.030020635702475  
RAB11FIP2 -0.575233169007673 0.029892592170687  
TSNAX -0.628132535627418 0.029861513906736  
FAM49B -1.04069481457475 0.029787227736168  
ARHGAP30 -1.47936156625627 0.029718933329032  
CHST11 -1.10179184434298 0.029597770782293  
ERVK3-1 -0.869465713369986 0.029352837435395  
FGG -1.80727949445899 0.029257129619109  
DIP2B -0.590823303529681 0.029241972913094  
CD300E -2.20911034368223 0.029129315629642  
CCNC -0.790611948681123 0.028951850330435  
SRGN -1.45531697332474 0.028940782690941  
NKTR -0.854218986211078 0.028935497364488  
WDR11 -0.684763080480579 0.028848987802889  
CXCL16 -1.59116244316154 0.028818190845296  
POU2F1 -0.637384892855723 0.028760698058856  
PTGER2 -1.16200694569434 0.028447329348603  
SLC19A1 -0.813996714218555 0.028439730110462  
APOBR -1.29099596749869 0.028382138500288  
SNX5 -0.726652801139229 0.028222127124532  
CD302 -0.942722600976873 0.028151816084577  
NUP153 -0.602928865027501 0.027943706542511  
RP11-46H11.11 -0.873186433537422 0.027937622579041  
EPT1 -0.744098601223393 0.027873577262191  
GTF2A1 -0.618305020499451 0.027794043875517  
STK17B -1.33049329660362 0.027729687953912  
ZNF558 -0.732304994518143 0.027692482147598  
AFF2 -1.46250289824969 0.027634994323633  
SYNGAP1 -0.772580928233043 0.02757870285739  
DOCK5 -0.771453545882069 0.027484435413474  
ATG2B -0.631422694804708 0.027478837933184  
ATP6V1A -1.03717144934395 0.027406098869539  
AKAP10 -0.666897313248847 0.027377572128385  
NECAP1 -0.619852357962867 0.027277531773526  
LHFPL2 -1.07497322789232 0.027175665880317  
TBX4 -2.42645844744497 0.027168143599037  
GRINA -0.822618033992241 0.027154187496137  
LAIR1 -1.36674310544847 0.02710973300655  
FHDC1 -1.5396227815828 0.02695759385135  
CD83 -1.48293046187538 0.026955961701545

RNASET2 -1.10437224478193 0.026918333233168  
MZF1 -0.761009287602251 0.02661336330663  
VPS37B -0.768081309526727 0.026610655074815  
CDK2 -0.94094373288628 0.026597051043449  
PIP4K2A -0.823577657445145 0.026587028804246  
GSPT1-0.823792218200086 0.026578676968081  
ARID3A -0.817921141320496 0.026524150737087  
ARPC2 -0.724997110304903 0.02650809781364  
TLK2 -0.680577643322697 0.026317843175629  
SLC25A5 -0.570723632232594 0.026316838502109  
CNOT2 -0.742894167497577 0.026288705521966  
RAPGEF6 -0.836370106852043 0.026219459244966  
MCTP2 -1.34034151411749 0.02617877371124  
RFWD2 -0.510546877918756 0.025965521541147  
RP11-423E7.2-1.34185464165583 0.025963240440431  
SLC19A2 -1.4397760977607 0.025910903236542  
ZFP36 -0.919932693527891 0.025700795857827  
ADAMTSL2 -1.5290600265068 0.025672664635045  
LCOR -0.7802599173354 0.025573573487264  
GPD2 -0.735220877330648 0.025527648173493  
TC2N -1.02594947795719 0.025478256557792  
ACTR3 -0.939260296140008 0.025364657523974  
LAMP3 -2.7312886498718 0.025194483557565  
NPL -1.54797176013367 0.025158765461062  
PATL1 -0.734200216940955 0.025025575068185  
MME -1.42554133452298 0.024942760270555  
JARID2 -1.00427589275722 0.024905310384359  
IRAK1-0.745862699376486 0.024830235958326  
WDR27 -0.676143051439634 0.024798291950808  
LARP4B -0.626390114301603 0.024688517807062  
NAP1L1 -0.972838651899652 0.024586014077983  
GATAD2B -0.644212418419114 0.024585237804088  
CELF2-AS1 -0.991968617420598 0.024404312608177  
CBFB -0.654489298555269 0.024368584608485  
SLC17A5 -0.84804907567847 0.02434397334825  
LOH12CR1 -0.939163257277481 0.024074146759015  
ARL4C -1.27729211589638 0.023994331054211  
ADIPOR1 -0.698995366329368 0.023867082350787  
HSPA13 -0.663187850888687 0.023857710652083  
BIRC2 -0.683069987587968 0.023796625499806  
FAM133B -0.716863160485183 0.023557514959319  
RABGGTB -0.799622791665217 0.02353753951716  
NCEH1 -1.18878746305154 0.023499416107773  
LONRF3 -0.876185706173772 0.023433814452768  
PTAR1 -0.944433125557484 0.023169008241309  
P2RY1-1.02492989802272 0.023131618966028  
HMGA1 -1.06877580017529 0.023129918258991  
TRIM38 -0.849117417287266 0.022942041920124  
LRP2 -2.21094847206404 0.022916537960171  
MPP1 -1.20406374525078 0.022772677108379  
LRRK2 -1.57107135158904 0.02266309045508  
RBM27 -0.71661117970541 0.022411247958464

ZNF331 -0.950988430755085 0.022212480722392  
GMPPB -0.938518652352047 0.022033862777857  
RNF24-0.805322466775261 0.022005468527119  
INSIG1 -0.964518545684693 0.021866969499749  
TNFRSF10C -1.56410540946004 0.021473105053615  
SDK2 -0.987183254226381 0.021265362909421  
LRRC59 -0.632125223315395 0.021255940570427  
GLUL -1.70234731246567 0.020842819835951  
RUNX1 -1.12336717409878 0.020681947180855  
ARRDC1 -0.739637117625673 0.020514871562778  
TMA16 -0.762891943950812 0.020508584181405  
CHST15 -0.838960405130058 0.020388838390728  
C9orf72 -1.20622547826014 0.020381528473307  
ACAP2 -0.845455005068548 0.020105973679943  
RNF166 -0.893973025747134 0.020088589951689  
NOTCH2NL -1.04996494491285 0.020059721503864  
TMF1 -0.655987880451357 0.020049006909153  
RABL3 -0.988896193223483 0.020044880372819  
PKHD1L1 -1.28726253299679 0.019994828048194  
PDZD8 -0.755765307954404 0.019902071562669  
RRM2B -1.08847407339558 0.0198357721681  
MFSD2A -1.74325764138149 0.019830259934464  
DCP2 -0.807810665372877 0.019615437453698  
SLC25A44 -0.812788962789928 0.019395470150512  
UGCG -0.834055559601372 0.019221298223359  
PLK3 -1.21321505973266 0.019155180892869  
IFRD1 -0.739439310062312 0.01906075891906  
THBS1 -1.64203581578447 0.018970694029849  
ZNF746 -0.711754061381064 0.018951117101577  
PTP4A1 -1.09788674355396 0.018919291342842  
DDIT4-0.969418393428321 0.01878604652985  
ZFAND5 -1.06577194761317 0.018685560369551  
CITED2 -0.87964609049423 0.01867384198994  
LGALSL -0.967938688768284 0.018670984809886  
HIF1A -1.57323005540772 0.018649740645782  
ADRBK2 -1.07342204789112 0.018621797774957  
CHML -0.752729006207049 0.018601731377896  
SERTAD2 -0.608998187279904 0.018559410796463  
AREG -1.54616277821917 0.018435249321583  
NBPF19 -1.45974402861371 0.01837178694617  
TNFAIP3 -1.27794838934085 0.018274767569229  
SNX30 -0.964785239560908 0.018249699397582  
FOSB -1.98219799912535 0.018243344977977  
AP4E1 -0.628185135185101 0.018227671062471  
SNX13 -0.695677814947202 0.018120549155012  
FAM65B -1.34178590158213 0.017951909246709  
TAF9B -1.23371072586708 0.017939327557518  
CMPK1 -0.765213445568218 0.017754227605826  
DUSP1 -1.03866949133751 0.017721253052079  
CDC42SE1 -0.65883067984278 0.017664834706574  
MDM4 -0.660323833117675 0.017586264783781  
ARRB2 -0.877196852039018 0.017561019708957

MASTL -1.20356174227642 0.017453960469272  
IRS2 -1.02774274110828 0.017411220080221  
MEGF9 -1.18434549863376 0.017373590815198  
ARID3B -0.880048588911643 0.017362217767173  
GOLGA8A -1.37196073110093 0.017296258415805  
USP53 -1.35649817180364 0.017270317141102  
NAA50 -0.957459597161295 0.017203202378408  
CYB5R4 -0.793695684815658 0.017179148694794  
NOLC1 -0.684601967637942 0.017126938357097  
PTGS2 -1.81046790102558 0.017073733081038  
HLTF -0.873812416401071 0.01691229967923  
RIT1 -0.694907125918179 0.016815876225  
ZCCHC8 -0.748592586209269 0.016672885526639  
HNRNPA1 -1.1083769458962 0.016606308839689  
OXSR1 -0.678385113427829 0.016559986764772  
SNHG12 -0.890439854795563 0.016536238495776  
TREM1 -1.71997624772032 0.016464830116995  
CCNG2 -0.841472690547472 0.016429090532213  
CCP110 -0.77807115730246 0.016417654681785  
MAP3K7 -0.661873627301017 0.016329728849311  
RIMKLB -0.63081260996245 0.016192712438289  
ABCC4 -1.05313589852371 0.016029439700195  
ANKRD13A -0.846075318659332 0.01602825220699  
TMEM39A -0.776909260818615 0.016002416241363  
PPME1 -0.699042496972194 0.015918244248802  
SLC36A4 -1.13596502757805 0.015910611034715  
NPHP3 -0.746005283680909 0.01577654919807  
MMP25 -1.40440758945249 0.015708518699631  
AEN -1.18789850597847 0.015694512264637  
MAMLD1 -1.57588143893 0.015585137380778  
ZBTB43 -0.819542649031916 0.015374883835775  
CACUL1 -0.739219893636856 0.015355468310216  
EXPH5 -2.27837641191468 0.015277157726911  
FBXO34 -0.750534192426621 0.015272397074827  
IGSF10 -1.50458910037595 0.015199698776099  
CMTR2 -1.00483792123421 0.015117623265925  
THEMIS2 -1.39622345483537 0.014939481640305  
FOS -1.32965395988091 0.014903161078282  
F2R -0.785844383559047 0.014769284446387  
STXBP2 -1.64645812871997 0.014716011056122  
SNHG17 -1.15918198434012 0.014689735299804  
FOXO1 -0.917766828439399 0.014614441356284  
PRRC1 -0.717506112285489 0.014579855024899  
STK4 -1.10625587987372 0.014492036193737  
STEAP3 -1.49054854843768 0.014394896405395  
KIAA0907 -0.764565157069395 0.014380757212466  
ZXDC -0.692890789760151 0.014375990738631  
CTB-152G17.6 -1.14166020593529 0.014309262346067  
TANC2 -0.832321973698059 0.014298887926982  
TMEM41B -0.784984477867376 0.014241296026092  
ZNF678 -0.885579048152382 0.01420953363176  
VMP1 -1.31653224988719 0.014173750647376

LIMS1-0.828658941215013 0.014107884042018  
ACER3 -0.864634627989837 0.014100159752525  
ERMAP -1.08515571564368 0.014067949689711  
BACH1 -1.13391229081428 0.014067015801183  
MYO19 -1.08709195575099 0.014005653838236  
CNOT8 -0.793087022794803 0.013977456056011  
P2RX4-1.09136936597209 0.013912236714671  
SLC38A5 -1.5805362823334 0.013889419519995  
ALPL -1.74986527186036 0.013888230160626  
DDI2 -0.989121307097017 0.013837353259242  
RP11-1023L17.2 -1.19329176137705 0.013751412846681  
IRAQ2-1.22264230379035 0.013676725906152  
HCLS1 -1.10546495501136 0.013653870398441  
RP4-530I15.9 -1.61156088689854 0.013641607817403  
TTC19-0.802192730527064 0.01361753997217  
PIK3IP1 -0.782931848114087 0.01335906757362  
BCL2L1 -1.24041712002673 0.013347026333428  
COX15 -0.797832034521402 0.013231785006494  
BAG4 -0.7567061798779 0.013220975639578  
EML4 -0.925394687406438 0.013211069395584  
WSB1 -1.11557600943723 0.013174657875607  
PI4K2B -0.955236678664347 0.013170578522475  
RASGEF1B -1.90007257732022 0.013166189249064  
EIF2S3 -0.781832696919538 0.013140158993063  
LIN54 -0.874138321251885 0.013131687535125  
KRAS -0.962261136018053 0.013014768118266  
TVP23C -0.974826367566677 0.012920223373705  
HMGN1 -0.811564501611699 0.012802180459074  
FGR -1.47331140075603 0.012734771353277  
MYSM1 -0.70584033645586 0.012734712385551  
CNNM2 -0.788354728428904 0.012683840842185  
ZNF217 -0.828998859062435 0.012678331833696  
IFI30 -1.93169464198825 0.012669349717119  
GPR176 -1.55290984661543 0.012606441121221  
CDC40 -0.795221590229708 0.012553413947548  
BHLHE40 -1.10823945876165 0.012521024678809  
PFKFB2 -1.41314257014912 0.012424814613585  
PAPD4 -0.71772172428877 0.012314671921903  
EMR2 -1.52413200755026 0.012296808103158  
ESM1 -2.22613587058188 0.012201332419398  
LYN -1.24838101153849 0.012046204235925  
FAM104A -0.77786982084511 0.012014811806401  
PIK3R5 -1.63532084567657 0.011857388095394  
HPS4 -1.0288470694854 0.011829277192121  
UBA5 -1.06428751471481 0.01181953329777  
ERO1L -0.983569848379406 0.01180112426306  
SLC36A1 -1.13730724958299 0.011800326912602  
SAT1 -1.57996738863876 0.011679418235148  
PDE3B -0.944971655322003 0.011556798242796  
ZNF439 -0.826801040747824 0.011381072275732  
FBXO7 -0.845675506180213 0.011378771293218  
NFKBIA -0.970310319625739 0.010944947333885

TIPARP -0.929295707192056 0.010921713718646  
DDX21 -0.683812810896354 0.010881870994598  
PER1 -0.975556516333086 0.010843784324183  
DOT1L -0.996508197240933 0.010833725935377  
STX3 -1.13942359266402 0.01065944031301  
B3GNT5 -1.58409424460117 0.010617280789692  
POLR2J3 -1.00663550182936 0.010398586078358  
JUNB -0.98239249226662 0.01030381623694  
HAUS6 -0.991628649587024 0.010144948189594  
GLO1 -0.879307001862221 0.010105578242049  
IGF2BP2 -1.38468769388107 0.009963963842035  
TBCEL -0.821403368455564 0.009814710903086  
NCF2 -1.32233370067594 0.0098139949687  
ZNF800 -0.83888263172899 0.00976128009318  
NRAS -0.906985015088943 0.009686490207148  
RNF149 -1.34261268558986 0.009584967571734  
RCOR1 -0.961694139153492 0.00946854726669  
EHBP1L1 -0.993736044718068 0.009384715057316  
TRIM27 -0.599510991453375 0.009323557488025  
SETDB2 -0.793526277062068 0.009106691447976  
CXCL8 -3.16670565708635 0.009059487153437  
ERRF1 -1.52879399380808 0.008967232310326  
LITAF -1.06353092383367 0.008963628964149  
ERI1 -0.890790668977961 0.00879711384475  
DUSP6 -0.987376553358764 0.008681648542952  
PUS7L-0.878883877113424 0.008591402454922  
SLC20A1 -0.944403564965326 0.008543582043082  
ATP2B1 -0.916914318512383 0.008531837082168  
MAP3K2 -1.24384606168118 0.008506963478678  
LILRB3 -1.78681404759267 0.008456427312042  
IL6 -2.10338031253641 0.008326400341792  
TAB3 -0.853871211394617 0.008291908713836  
SLC22A15 -1.21833213602484 0.008282868185155  
BBC3 -1.59873259168252 0.008129678450108  
RP11-295P9.3-0.929582293377299 0.008029236563201  
OLR1 -2.09421073816563 0.007996259985143  
NUDT21 -0.787872183579434 0.007820563711676  
RP1-309I22.2 -1.98399353464243 0.00771038154842  
UPP1 -1.40269769338222 0.007581494620796  
GADD45B -1.07885694054726 0.007568964394318  
ADAMTS8 -2.18471061762939 0.007315091787792  
BASP1 -1.86831588751455 0.007307203601518  
IL18R1 -1.84198864078584 0.007176290783388  
ADAMTS2 -1.21943456749765 0.007172313704092  
RIOK3-0.853840425976544 0.007007804394676  
SS18L1 -1.19718662927915 0.006809404352597  
FKBP5 -1.27143990290826 0.006784596198405  
CDC27 -0.890241517636242 0.006712216342364  
PYGL -1.33791083658085 0.00667465042921  
CMTM3 -0.880529900360722 0.006607731788755  
EAF1 -1.18543687693512 0.006552431761438  
OGFRL1 -0.956014613943479 0.006529963334355

PELI1 -0.800881082227392 0.006459948639535  
UHMK1 -1.04084220052535 0.006409939891456  
CD300A -1.85478073939685 0.006182157116057  
RGL3 -1.2542423250796 0.006141456170011  
BLOC1S6 -0.657712727751588 0.00606930730683  
PIM1 -1.00827201556046 0.006014100933203  
IL18RAP -1.72393210771315 0.005988627019038  
PANK3 -0.777229271641867 0.0057532018704  
ELK4 -0.940973374155456 0.005715337768385  
TTLL3-0.991806287536157 0.005685487677145  
SERINC5 -0.928607771683874 0.005521949223644  
ITGAX -2.50764779295252 0.005354081793939  
LRCH4 -1.17963827428282 0.005244692938898  
KIAA1715 -1.02666846126927 0.005217613019063  
SLC11A1 -2.19500407623416 0.005184420801139  
CTD-3252C9.4 -1.28529730587385 0.005105041613726  
FAM35A -0.843557462633754 0.005007976867309  
RASSF1 -0.989770999714363 0.004916438954463  
TDG -1.06456874461634 0.004901475285048  
KBTBD11 -1.50839405913259 0.004877486596347  
SLC26A2 -1.03108234060135 0.004787366530411  
WDFY2 -0.768005607772611 0.004752619045295  
MBNL3 -1.13491279177859 0.004674494556471  
DENND3 -0.969143701943516 0.004654391944377  
ALOX5 -1.47956156595565 0.004623641542023  
DDX39B -1.0623307628959 0.004622469432273  
CHSY1 -0.815883668694872 0.004476660022447  
TET3 -1.18346495445149 0.004335074309407  
MDM2 -1.23286307386157 0.004283790685417  
GK -1.76722575789054 0.004238048258153  
CROCCP2 -1.32566235074839 0.004111569122643  
CCDC14 -1.04892994122793 0.004095342102813  
CTC-444N24.11 -0.735469040288133 0.00397359610244  
EDEM1 -1.29843999852276 0.003965063337117  
LRRC75A-AS1 -1.13010332854666 0.003933866057612  
ELL2 -1.4407067318132 0.003902772147221  
ERAP2 -1.58819964747533 0.003830430048151  
AMPD3 -1.9559846971759 0.003815445583511  
SLC25A37 -1.58466470912524 0.003806751032854  
CCNK -1.05897315277987 0.003729817829575  
RBM3 -1.67805250148104 0.003715631738967  
NR4A2 -2.02796920763398 0.003595596453654  
PTBP3-1.11491101569623 0.003577565955622  
GZF1 -1.06348189469898 0.003576505320785  
DCAF12 -0.932369627344722 0.003449470091685  
USP32-0.920287324939752 0.003412994052707  
PNPLA8 -0.95744446914723 0.003404005481548  
CTD-2033D15.2 -2.25502846005875 0.003264750161334  
AC092881.1 -1.50408437304301 0.003236686479766  
C5AR1 -1.6946846217429 0.003229077168407  
ATP13A3 -1.27799593408033 0.003208933270301  
RLIM -1.01619452537479 0.00303587861501

|               |                    |                   |
|---------------|--------------------|-------------------|
| MMP19         | -2.28854779640845  | 0.003031212474158 |
| AC068580.6    | -2.17576896439619  | 0.002985842695343 |
| SLC30A7       | -0.917595505391155 | 0.002906034749065 |
| EBLN3         | -0.972842839567279 | 0.002855691739124 |
| OSBPL8        | -1.31980234451625  | 0.00280384977912  |
| LRRTM2        | -0.977129000129245 | 0.002720174415181 |
| ATG16L2       | -1.45642726863942  | 0.002664804852114 |
| GDF15         | -2.53416058812566  | 0.002655023783421 |
| NABP1         | -1.87138278974918  | 0.00251846085469  |
| SNTB1         | -1.2559821690037   | 0.002500185834633 |
| NME9          | -1.48625724413971  | 0.002474668269984 |
| WDR26         | -0.890047971280282 | 0.002433494564656 |
| ATP6V1B2      | -1.33854507508441  | 0.002336320464651 |
| PTEN          | -0.968273243945867 | 0.002331424396947 |
| BNIP3L        | -1.05057931804877  | 0.002325383706918 |
| TMED8         | -0.973424397964796 | 0.002282008964548 |
| REL           | -1.15271020563162  | 0.002262427250128 |
| RP11-752L20.3 | -1.57395550264162  | 0.002258680759729 |
| SMAP2         | -1.71047726043119  | 0.002244331533419 |
| RP11-680G24.5 | -1.9428045997536   | 0.002179648739462 |
| H3F3A         | -1.21646446569178  | 0.002064708233908 |
| GLRX          | -1.24500951099687  | 0.001953626902917 |
| RP11-104N10.2 | -1.45347850200623  | 0.001933601287154 |
| BEST1         | -1.40687071841764  | 0.001917042628622 |
| HS2ST1        | -1.10301848566805  | 0.001901496923059 |
| H2AFY         | -1.32081375232994  | 0.001854499406062 |
| DDHD1         | -0.830012078773119 | 0.001793715530223 |
| ENPP4         | -1.03910442345292  | 0.001756810666072 |
| RP11-415J8.3  | -1.5893564580824   | 0.001726738291706 |
| YOD1          | -1.46009096718521  | 0.001720274876487 |
| FAM213B       | -1.22280841097589  | 0.001713127388297 |
| FOXO3         | -1.05034875403992  | 0.001692865483556 |
| NAMPTP1       | -1.95874607714139  | 0.001677676413924 |
| KLHL2         | -0.889891032641533 | 0.001659714393411 |
| IL1R2         | -2.94092775225322  | 0.00162993397553  |
| NCR3LG1       | -1.94541027878898  | 0.001601428548125 |
| AVL9          | -0.846610948172124 | 0.001574727462657 |
| NDEL1         | -0.796434365221325 | 0.001558217592997 |
| ADPGK         | -1.21561986619086  | 0.001556101005842 |
| AGFG1         | -1.06219430190764  | 0.001547437949988 |
| GLDN          | -2.17006358890939  | 0.00152790533564  |
| ARHGAP19      | -1.53065414078826  | 0.001342730843607 |
| TXNL4A        | -1.10671095144536  | 0.001319739892112 |
| S1PR2         | -1.04586528504588  | 0.00131949174342  |
| MXD1          | -1.72707788843913  | 0.001267272573294 |
| FNIP1         | -0.877627833704669 | 0.001245974844731 |
| C1GALT1       | -1.18817354888797  | 0.00123171431873  |
| RP11-107E5.3  | -1.52121032928464  | 0.001179680816275 |
| SLC2A3        | -2.18866006811161  | 0.001135312333323 |
| SLC31A1       | -1.11721262878305  | 0.001126180023068 |
| CSF3R         | -2.12367247910878  | 0.001088432497545 |
| TLR2          | -2.23112815547463  | 0.00107183291654  |



|               |                    |                      |
|---------------|--------------------|----------------------|
| GPCPD1        | -1.75831950457294  | 0.001028679627422    |
| DAP           | -0.977014281204668 | 0.000978321796758    |
| CTB-89H12.4   | -1.12289602087543  | 0.000975768492649    |
| SEH1L         | -1.11230595139576  | 0.000834939188199    |
| GADD45A       | -1.6068123848336   | 0.000831906710155    |
| LINC01578     | -1.13419861906504  | 0.00082863634669     |
| UVSSA         | -1.29366725512283  | 0.000820505507499    |
| KLF6          | -1.21943381661279  | 0.000804387946617    |
| NUTM2B-AS1    | -1.08383359478265  | 0.000758785990901    |
| ARL5B         | -1.09908357139053  | 0.000737132675682    |
| HILPDA        | -2.16205606826093  | 0.000719256977825    |
| MOB1B         | -1.16012320356707  | 0.000708759268626    |
| NAMPT         | -1.75778383256835  | 0.000708167172181    |
| CCNL1         | -1.32918892215075  | 0.000601965435882    |
| ADM           | -1.66753173592187  | 0.000532670378748    |
| BRI3          | -1.05402873070652  | 0.000532293185167    |
| RELT          | -1.46240022899999  | 0.000417657898672    |
| EIF4A1        | -1.16842345685302  | 0.00039608747651     |
| HK2           | -2.18978772470103  | 0.000394742888391    |
| MAPK6         | -1.33796073874914  | 0.000366559166107    |
| SLC16A3       | -1.77578728774831  | 0.000359551129723    |
| SLC6A6        | -1.62963148017931  | 0.000353798810078    |
| GPATCH2L      | -0.979361795729012 | 0.000301129782788    |
| SLC16A6       | -3.20829739397303  | 0.000268625118537    |
| TFRC          | -2.38319903302317  | 0.000261879669427    |
| USP49         | -1.36977141851268  | 0.000258797660872    |
| SLC11A2       | -1.3757832377853   | 0.000252388179103    |
| ENTPD7        | -1.34209298049025  | 0.0002237731487      |
| RP11-437B10.1 | -1.6442168374162   | 0.000188902969671    |
| PTX3          | -2.97360495216617  | 0.000180932364061    |
| RP11-463O12.5 | -1.50731344345757  | 0.000161279918298    |
| ZNF638-IT1    | -1.6475029579887   | 9.53483217792537E-05 |
| PAG1          | -1.78597492727201  | 8.32357295358576E-05 |
| CSGALNACT2    | -1.70814476302253  | 7.83765712035459E-05 |
| LIF           | -2.91508641818152  | 6.82392594174629E-05 |
| NUPL1         | -1.47834233626953  | 6.19977332483482E-05 |
| IRAK3         | -1.67909542810095  | 4.89201552790743E-05 |
| RP3-394A18.1  | -1.41524981699574  | 3.04727887003569E-05 |
| AC007278.3    | -3.31147030076245  | 1.69036930690998E-05 |
| PFKFB3        | -1.67375775766138  | 1.35606527173223E-05 |

## GSE155241

### Upregulated

**gene\_symbol logFC P.Value**

|          |                   |                   |
|----------|-------------------|-------------------|
| SMYD3    | 1.30251565029173  | 0.00762481724439  |
| CDC42EP5 | 1.03179404384056  | 0.009031666932179 |
| RPS27L   | 0.807237492990884 | 0.010243172058959 |
| CCAR1    | 0.607864463391292 | 0.012284872529204 |
| WDR19    | 0.656418056365439 | 0.013675794246461 |
| LOXL1    | 1.25135468254145  | 0.016046346446367 |
| STX8     | 0.88009922825633  | 0.017267799022984 |
| PHLDA3   | 0.86517192351909  | 0.019069691814266 |

ALG9 0.657441138370908 0.019733323620441  
AMZ2 0.602123215166927 0.02038153190483  
FN1 1.03896146344408 0.020683876799123  
GIPC1 0.784934418243742 0.022262692005175  
AKR1A1 0.800986147406864 0.022322301782835  
CTD-2545G14.7 2.77239540281221 0.023331807742048  
FAM229B 0.902760632480542 0.024263195542639  
C14orf2 0.767632904731066 0.024538987745867  
COL16A1 1.29672248404783 0.024723660817773  
TTC39C 0.725271805272444 0.024785992973682  
MAP2K2 0.624762284901637 0.026450499912604  
CPSF30.650164480116808 0.027252069899166  
CYFIP2 0.584034748109364 0.028602293813221  
NDUFB3 0.590897707997834 0.029355531464605  
RAD51C 0.504174328527922 0.029512980831546  
TMEM261 0.763711265527278 0.029727817361842  
PTGFRN 0.901652969114132 0.030396676545536  
RGS140.859035901477344 0.032867110104354  
CYP2R1 0.61435208859618 0.033735566590112  
MTIF30.62224459023553 0.033819839496644  
MIB2 0.791343033851315 0.034858778723714  
FAM219B 0.726727395861504 0.036913328323012  
COPE 0.844447737835218 0.036954896532897  
HIST1H2BD 1.46504452150091 0.037780343395209  
DTNB 0.786173374275153 0.038610284005958  
SAP30L 0.861804467381777 0.039226303269815  
LUC7L3 0.970827067192292 0.040770163203657  
REXO1 0.730662051793015 0.040826511481483  
ACOT13 0.993876646872254 0.041068734671694  
FAM96A 0.577056085419265 0.041102155340989  
NEDD8 0.563137601872459 0.041252022508283  
MTCP1 1.15671654191891 0.042511395589728  
ABHD17A 0.890712517796783 0.042975996754554  
TRAPPC2L 0.687926220780914 0.043436664742237  
SGCE 0.727572263452315 0.043551330802394  
LLGL2 0.734852233887342 0.044576445108025  
SIRT6 0.645054559426015 0.045182780401196  
MDH10.603235462996016 0.04537242419392  
VPS33B 0.814046470968059 0.046348555508575  
EFEMP2 0.756873309602192 0.046912765473613  
ANO9 1.28523141225799 0.048363564370078  
SAMD1 0.769049102641808 0.048617776338688  
NUDT2 0.546744491511691 0.048918907776399  
RP11-298I3.5 0.932013494439674 0.048921980515892  
MCTS1 0.64238395988761 0.049029531712096  
PTOV1 0.569725201161264 0.049245448466564  
SMYD2 0.780368529504051 0.049386331245998  
PHF140.690907115140375 0.049576876283333  
SWI5 0.670564257067442 0.04967180320118

## Downregulated

CMIP -0.702168069215766 0.049966412328321  
ATP1A1 -0.591267854501984 0.049411158060246  
CDC42BPB -0.79065794635338 0.04910946755984  
SIK1 -0.901426574078388 0.04891922994295  
ERRFI1 -1.17065599852261 0.048764092273361  
RAI14 -0.770780795486171 0.048649978991756  
CD200 -0.99438215255487 0.048170470730784  
WASF2 -0.554693240636328 0.047800726119494  
GOLT1B -0.803359066529631 0.046021302358574  
JAM3 -0.802254446901803 0.045976669112543  
BNIP2 -0.503960562635377 0.044859186661121  
ZNF263 -0.571188663056805 0.044160908976147  
ARRB1 -0.69039190116891 0.044130911553696  
LDLR -0.933043074776835 0.043744036971444  
FBXL3 -0.618798594237152 0.043374217630971  
NOLC1 -0.886771781352663 0.04234431129262  
TCN2 -0.589729996829425 0.041947772186095  
MPZL2 -0.60788683118893 0.04086133292758  
ELF1 -0.651036974574354 0.039994865828138  
NUPL1 -0.708350622573227 0.03882164871505  
CMTM8 -0.549838614528696 0.038731550722882  
STC1 -2.45522953470475 0.038653291795802  
ACKR3 -1.22445061666505 0.038517002723542  
DR1 -0.653348272299716 0.036956178155672  
CYFIP1 -0.522127158942009 0.036874229944739  
PHLDA1 -1.20820468175288 0.035277932248682  
MOB4 -0.507329519989721 0.035269158994608  
MCMBP -0.649998648374649 0.035180734607416  
SLC25A4 -0.515952560021832 0.033788844755148  
CSNK1D -0.549195931150809 0.033361340800498  
ATP2A2 -0.711660323217993 0.03332624038058  
SLC12A7 -0.529506423540625 0.03315799609939  
SLC19A2 -0.642785338911297 0.033016959141448  
MAT2A -1.03323801758992 0.032978354480919  
YWHAG -0.572348266120044 0.032850519071499  
NUP98 -0.709263465644194 0.032802054828113  
MIDN -0.693975850018416 0.032775135359809  
UGCG -0.981934524068011 0.032509149172945  
ECE1 -0.86933087386031 0.03195344677785  
AQP3 -0.813302678466522 0.031877338694982  
SNN -0.656226774278413 0.027913562140005  
CCAR2 -0.529968081816735 0.026822132883594  
JUN -1.06200474193041 0.024696793307385  
ETS2 -1.29523475974473 0.024305303556916  
CD9 -0.605771340406605 0.023875149385434  
SPSB1 -0.96755991153186 0.023823341040988  
SYS1 -0.562209693716119 0.023682306090983  
THBD -1.34521436908379 0.021410538236251  
PFKFB3 -0.903724507986315 0.020677436288685  
TMEM2 -1.05276186040938 0.020496377702317

TSPAN14 -0.855324247266825 0.020236857785224  
NDRG1 -1.11806327887312 0.020088576184363  
AAR2 -0.596507347090173 0.018238925152089  
B4GALT5 -1.02372050583373 0.018186549620934  
SYPL1-0.646692160609632 0.018014858085905  
SEMA3F -0.87924973158786 0.017829712791013  
TIPARP -1.44240466554153 0.016854192786103  
SPRY2-1.04291913583563 0.016301555054811  
PEX5 -0.973834658071353 0.013258206768151  
LRRC8A -0.783825724995473 0.013026106944295  
KLF10-1.20381790510923 0.012630880444863  
ABL1 -0.811923982242501 0.012438408791228  
DUSP6 -1.33578336257542 0.00892068422602  
SEMA4C -1.07484123496354 0.008648233928523  
HES1 -1.00046416903974 0.005398166458272

## 5. Supplementary information on pathways

### Kegg upregulated pathways

#### Term P-value

|                                                            |                      |
|------------------------------------------------------------|----------------------|
| Huntington disease                                         | 4.94411853507123E-17 |
| Parkinson disease                                          | 5.9391049284398E-16  |
| Oxidative phosphorylation                                  | 6.16438714917146E-15 |
| Non-alcoholic fatty liver disease (NAFLD)                  | 1.77326787631063E-14 |
| Alzheimer disease                                          | 1.12816326428253E-13 |
| Thermogenesis                                              | 2.63449898977764E-12 |
| Retrograde endocannabinoid signaling                       | 3.02117301974943E-11 |
| Cardiac muscle contraction                                 | 0.000291875262904    |
| Systemic lupus erythematosus                               | 0.000588418529793    |
| Propanoate metabolism                                      | 0.000628315862242    |
| Arrhythmogenic right ventricular cardiomyopathy (ARVC)     | 0.002937975416975    |
| Citrate cycle (TCA cycle)                                  | 0.003090716437485    |
| Alcoholism                                                 | 0.003332192230608    |
| Inositol phosphate metabolism                              | 0.003488333254667    |
| ABC transporters                                           | 0.017512010379131    |
| Phosphatidylinositol signaling system                      | 0.019105990036933    |
| Tight junction                                             | 0.030186196687815    |
| Vascular smooth muscle contraction                         | 0.035574786678319    |
| Lysine degradation                                         | 0.049033555850626    |
| AGE-RAGE signaling pathway in diabetic complications       | 0.0531525629649      |
| Fatty acid elongation                                      | 0.061879766280688    |
| Hypertrophic cardiomyopathy (HCM)                          | 0.068249859373761    |
| Acute myeloid leukemia                                     | 0.072516492761664    |
| Valine 4/48                                                |                      |
| RNA polymerase                                             | 0.086249586012207    |
| beta-Alanine metabolism                                    | 0.086249586012207    |
| Dilated cardiomyopathy (DCM)                               | 0.08824163702912     |
| Morphine addiction                                         | 0.08824163702912     |
| GnRH signaling pathway                                     | 0.095545292182452    |
| Thyroid hormone signaling pathway                          | 0.098959029187999    |
| SNARE interactions in vesicular transport                  | 0.106771054510122    |
| Cell adhesion molecules (CAMs)                             | 0.119548334344458    |
| African trypanosomiasis                                    | 0.128979016740106    |
| ECM-receptor interaction                                   | 0.144872592900616    |
| Viral carcinogenesis                                       | 0.145468660415613    |
| Ribosome                                                   | 0.148400510389738    |
| Relaxin signaling pathway                                  | 0.152314764305142    |
| Arginine biosynthesis                                      | 0.157722297107585    |
| Insulin secretion                                          | 0.166536129025027    |
| Wnt signaling pathway                                      | 0.167999967742504    |
| Tryptophan metabolism                                      | 0.169130659228056    |
| Terpenoid backbone biosynthesis                            | 0.169809651957453    |
| Transcriptional misregulation in cancer                    | 0.180524886973932    |
| Fatty acid degradation                                     | 0.186094914368533    |
| Long-term potentiation                                     | 0.191325096882334    |
| Proteasome                                                 | 0.194737808722587    |
| Epithelial cell signaling in Helicobacter pylori infection | 0.198271696441733    |

Fc epsilon RI signaling pathway 0.198271696441733  
Renin secretion 0.205293532541604  
Folate biosynthesis 0.219405591557276  
Endocrine and other factor-regulated calcium reabsorption 0.221214137386926  
Circadian entrainment 0.231782029382331  
Sulfur relay system 0.240836335710997  
Butanoate metabolism 0.244652147723646  
Melanogenesis 0.257128769636936  
Oxytocin signaling pathway 0.261765437419264  
Purine metabolism 0.27223941209988  
Circadian rhythm 0.282672838608074  
Mucin type O-glycan biosynthesis 0.282672838608074  
Parathyroid hormone synthesis 5/106  
MAPK signaling pathway 0.298689433914548  
Hippo signaling pathway 0.298827591143172  
Peroxisome 0.309321190290969  
Necroptosis 0.30962255028941  
Ubiquinone and other terpenoid-quinone biosynthesis 0.315381541633573  
Ubiquitin mediated proteolysis 0.31936203387294  
VEGF signaling pathway 0.322496001601811  
ErbB signaling pathway 0.324713869090346  
Fluid shear stress and atherosclerosis 0.331343492138544  
Long-term depression 0.331830814694123  
Alanine 2/35  
Prion diseases 0.333033641256557  
Apoptosis 0.355457071799713  
Fatty acid biosynthesis 0.360971451147907  
Proteoglycans in cancer 0.371386600799747  
Central carbon metabolism in cancer 0.37833425232219  
Mitophagy 0.37833425232219  
Pyruvate metabolism 0.382330227389842  
Phospholipase D signaling pathway 0.385753498103742  
Ras signaling pathway 0.386448403646733  
Rap1 signaling pathway 0.397143214950854  
Thiamine metabolism 0.403529630124736  
Staphylococcus aureus infection 0.405926519437459  
Amoebiasis 0.409560623921214  
mTOR signaling pathway 0.409998039827415  
Porphyrin and chlorophyll metabolism 0.418261166317339  
Aldosterone synthesis and secretion 0.424830628515541  
Pathways in cancer 0.431952722256346  
Progesterone-mediated oocyte maturation 0.432429051169879  
Autophagy 0.437177400579791  
Regulation of actin cytoskeleton 0.43835996604562  
Selenocompound metabolism 0.443257409995538  
Endocytosis 0.444417656944739  
Calcium signaling pathway 0.453163186269287  
Bacterial invasion of epithelial cells 0.459893749004455  
Type II diabetes mellitus 0.464446784906005  
Toll-like receptor signaling pathway 0.469963811402076  
Cysteine and methionine metabolism 0.475653071925996  
Hedgehog signaling pathway 0.475653071925996

Spliceosome 0.476761350948412  
Pertussis 0.477421484819903  
Steroid biosynthesis 0.480342770751487  
cGMP-PKG signaling pathway 0.49360065853817  
Apelin signaling pathway 0.496211647863625  
Insulin signaling pathway 0.496211647863625  
Arginine and proline metabolism 0.497631337499604  
Malaria 0.497631337499604  
One carbon pool by folate 0.497949855664012  
Complement and coagulation cascades 0.503201901252851  
Hepatocellular carcinoma 0.50525609245029  
Focal adhesion 0.512785873928097  
TNF signaling pathway 0.513731507464579  
Cholinergic synapse 0.527950366464178  
Leukocyte transendothelial migration 0.527950366464178  
PI3K-Akt signaling pathway 0.539375195213392  
Glycosaminoglycan biosynthesis 0.539775967715721  
Proximal tubule bicarbonate reclamation 0.547276643779424  
Fanconi anemia pathway 0.549923025597275  
NOD-like receptor signaling pathway 0.561924567654996  
Sphingolipid signaling pathway 0.576033330458353  
Gap junction 0.576326688966537  
alpha-Linolenic acid metabolism 0.577442027644375  
Pyrimidine metabolism 0.579410283804854  
cAMP signaling pathway 0.580040264905021  
GABAergic synapse 0.584025851080174  
Salivary secretion 0.591635392493427  
TGF-beta signaling pathway 0.591635392493427  
Viral myocarditis 0.59826731307893  
Fc gamma R-mediated phagocytosis 0.599154422534489  
Biosynthesis of unsaturated fatty acids 0.605600226852112  
Collecting duct acid secretion 0.605600226852112  
Oocyte meiosis 0.614951452273107  
Glycerolipid metabolism 0.616481668640067  
Osteoclast differentiation 0.627419811900003  
Linoleic acid metabolism 0.631884613386319  
Hematopoietic cell lineage 0.642330030526645  
Glyoxylate and dicarboxylate metabolism 0.644363369524459  
Pancreatic secretion 0.649198426952248  
Hepatitis B 0.650222039487665  
Cortisol synthesis and secretion 0.650992532331047  
Shigellosis 0.650992532331047  
Dopaminergic synapse 0.651572302719282  
Choline metabolism in cancer 0.655972464203525  
Aminoacyl-tRNA biosynthesis 0.659224589387987  
Non-small cell lung cancer 0.659224589387987  
Protein processing in endoplasmic reticulum 0.660759630413576  
RNA transport 0.660759630413576  
Inflammatory mediator regulation of TRP channels 0.662652021119936  
Amphetamine addiction 0.675220661547129  
Longevity regulating pathway 0.675727554091146  
Base excision repair 0.679321774076369

Adipocytokine signaling pathway 0.682987055775343  
Renal cell carcinoma 0.682987055775343  
C-type lectin receptor signaling pathway 0.688425394306832  
Pentose and glucuronate interconversions 0.690194626182804  
Prolactin signaling pathway 0.690600770144688  
RIG-I-like receptor signaling pathway 0.690600770144688  
Signaling pathways regulating pluripotency of stem cells 0.696664280158099  
B cell receptor signaling pathway 0.698063225404346  
Melanoma 0.705375920966391  
DNA replication 0.710848390358711  
Drug metabolism 0.712694247309046  
Insulin resistance 0.712694247309046  
Metabolism of xenobiotics by cytochrome P450 0.719558383342882  
PPAR signaling pathway 0.719558383342882  
Thyroid hormone synthesis 0.719558383342882  
Aldosterone-regulated sodium reabsorption 0.720653774381632  
Primary immunodeficiency 0.720653774381632  
Thyroid cancer 0.720653774381632  
Gastric acid secretion 0.726431482508089  
Glioma 0.726431482508089  
Adrenergic signaling in cardiomyocytes 0.727637952099419  
Breast cancer 0.737422412123885  
Serotonergic synapse 0.74094751294623  
Glutamatergic synapse 0.746325441828238  
Ferroptosis 0.748122236933058  
Glycine 1/40  
Nicotine addiction 0.748122236933058  
Human T-cell leukemia virus 1 infection 0.755084992635349  
Bladder cancer 0.756665335597767  
Fat digestion and absorption 0.756665335597767  
Homologous recombination 0.756665335597767  
Chemical carcinogenesis 0.770639483268867  
Neurotrophin signaling pathway 0.771886545023706  
Type I diabetes mellitus 0.772893267700163  
Cushing syndrome 0.773906578670015  
Chemokine signaling pathway 0.774684422782512  
Taste transduction 0.776420076419069  
Vasopressin-regulated water reabsorption 0.78059734294081  
Human papillomavirus infection 0.789639422587837  
Lysosome 0.790786089954575  
Colorectal cancer 0.793003105070087  
Cell cycle 0.795302571909459  
Ether lipid metabolism 0.802178746559184  
mRNA surveillance pathway 0.818233997613391  
Cholesterol metabolism 0.821640114704082  
N-Glycan biosynthesis 0.821640114704082  
Vibrio cholerae infection 0.821640114704082



## Kegg downregulated pathways

p53 signaling pathway 5.6858228961209E-07  
TNF signaling pathway 3.23949689166567E-06  
FoxO signaling pathway 7.3051700710994E-06  
Transcriptional misregulation in cancer 1.31557796856218E-05  
Cellular senescence 2.22896389529206E-05  
Pathways in cancer 3.68097953879826E-05  
IL-17 signaling pathway 5.3871997411462E-05  
Chronic myeloid leukemia 0.000189406655944  
Mitophagy 0.000266563742598  
NF-kappa B signaling pathway 0.000289909037129  
Non-small cell lung cancer 0.000299773856397  
Bladder cancer 0.000346031247629  
Human T-cell leukemia virus 1 infection 0.000359370878506  
Epithelial cell signaling in Helicobacter pylori infection 0.000376494348038  
Autophagy 0.001081506019363  
Kaposi sarcoma-associated herpesvirus infection 0.001309621624823  
Chemokine signaling pathway 0.001618283960021  
MAPK signaling pathway 0.001946805480208  
Leishmaniasis 0.002961161528043  
Rheumatoid arthritis 0.003070887297743  
Circadian rhythm 0.003193030779933  
Osteoclast differentiation 0.003213926406841  
Small cell lung cancer 0.003557014721769  
Prostate cancer 0.004709140156244  
Malaria 0.005245043179526  
Choline metabolism in cancer 0.00538447386314  
Shigellosis 0.005432344282429  
AGE-RAGE signaling pathway in diabetic complications 0.005749056224386  
Neurotrophin signaling pathway 0.006000419144408  
Measles 0.006022033522328  
Epstein-Barr virus infection 0.006942830453553  
Thyroid cancer 0.006967414299793  
Endocytosis 0.007191530103448  
Toll-like receptor signaling pathway 0.007401174479218  
Colorectal cancer 0.00740400969976  
Glycosaminoglycan biosynthesis 0.007711436458517  
Hepatitis B 0.007867055414474  
B cell receptor signaling pathway 0.008769333472387  
Legionellosis 0.009216214249793  
Melanoma 0.00944555811896  
Ferroptosis 0.009703325252174  
cAMP signaling pathway 0.010827856361182  
Collecting duct acid secretion 0.011218779501294  
Glioma 0.011702753490709  
Endometrial cancer 0.011849940482119  
Toxoplasmosis 0.012423830424981  
Thyroid hormone signaling pathway 0.014560599262735  
Cytokine-cytokine receptor interaction 0.018249546705731  
Central carbon metabolism in cancer 0.019967962493274  
Inflammatory bowel disease (IBD) 0.019967962493274

Apoptosis 0.020133208915641  
Acute myeloid leukemia 0.02137391305387  
C-type lectin receptor signaling pathway 0.02160030330368  
Fructose and mannose metabolism 0.022412478799322  
Salmonella infection 0.023326168573223  
Th17 cell differentiation 0.025122812279965  
Mineral absorption 0.025830764524115  
Renal cell carcinoma 0.025988811438493  
Phagosome 0.029195440374568  
MicroRNAs in cancer 0.039844827925675  
Hematopoietic cell lineage 0.041156812125749  
Vitamin digestion and absorption 0.043110108049431  
AMPK signaling pathway 0.045013094180446  
Phosphatidylinositol signaling system 0.045143692332205  
RNA transport 0.046896134756598  
cGMP-PKG signaling pathway 0.048502900540651  
T cell receptor signaling pathway 0.049370408877802  
Lysosome 0.050749464999394  
Longevity regulating pathway 0.051574658675485  
Cell cycle 0.052761692168055  
Chagas disease (American trypanosomiasis) 0.053839933225161  
Breast cancer 0.05457211519725  
mTOR signaling pathway 0.064623682477903  
Hedgehog signaling pathway 0.068450393671214  
NOD-like receptor signaling pathway 0.070694695900676  
Amino sugar and nucleotide sugar metabolism 0.072819418713741  
PI3K-Akt signaling pathway 0.078741074061082  
Prolactin signaling pathway 0.080811312046295  
Vibrio cholerae infection 0.081970350446652  
Inositol phosphate metabolism 0.096966741818384  
Pancreatic cancer 0.101243060929857  
Pertussis 0.105612030028085  
Pathogenic Escherichia coli infection 0.107154015332245  
HIF-1 signaling pathway 0.11255071169076  
Starch and sucrose metabolism 0.114390907742195  
Synaptic vesicle cycle 0.114622617044961  
Platelet activation 0.115644536625579  
Phospholipase D signaling pathway 0.116466113230005  
Complement and coagulation cascades 0.119261401790637  
RNA degradation 0.119261401790637  
African trypanosomiasis 0.121602918211171  
Aldosterone-regulated sodium reabsorption 0.121602918211171  
Human cytomegalovirus infection 0.125607142928609  
Pantothenate and CoA biosynthesis 0.128321475629469  
Viral carcinogenesis 0.128726873606388  
Oxytocin signaling pathway 0.133407040135543  
Tuberculosis 0.13792565961591  
Relaxin signaling pathway 0.138144186443714  
Insulin resistance 0.146382634264284  
ErbB signaling pathway 0.148863382306011

## Reactome- upregulated pathways

### Term P-value

Respiratory electron transport Homo sapiens R-HSA-611105 2.91264341923691E-21  
The citric acid (TCA) cycle and respiratory electron transport Homo sapiens R-HSA-1428517  
1.52795548735682E-20  
Complex I biogenesis Homo sapiens R-HSA-6799198 1.17988499157356E-14  
Metabolism Homo sapiens R-HSA-1430728 1.07372731447021E-05  
Mitochondrial translation initiation Homo sapiens R-HSA-5368286 2.49415645028422E-05  
Mitochondrial translation Homo sapiens R-HSA-5368287 5.02640293911422E-05  
Mitochondrial translation termination Homo sapiens R-HSA-5419276 0.000121210711134  
Mitochondrial translation elongation Homo sapiens R-HSA-5389840 0.000121210711134  
Beta oxidation of octanoyl-CoA to hexanoyl-CoA Homo sapiens R-HSA-77348  
0.000366927995294  
Beta oxidation of decanoyl-CoA to octanoyl-CoA-CoA Homo sapiens R-HSA-77346  
0.000366927995294  
Extracellular matrix organization Homo sapiens R-HSA-1474244 0.000682386125065  
Response to elevated platelet cytosolic Ca<sup>2+</sup> Homo sapiens R-HSA-76005  
0.001261498021981  
Integrin cell surface interactions Homo sapiens R-HSA-216083 0.001854920451169  
mitochondrial fatty acid beta-oxidation of saturated fatty acids Homo sapiens R-HSA-77286  
0.001903650002243  
Platelet degranulation Homo sapiens R-HSA-114608 0.002967424688856  
Citric acid cycle (TCA cycle) Homo sapiens R-HSA-71403 0.003361387679346  
Pausing and recovery of Tat-mediated HIV elongation Homo sapiens R-HSA-167238  
0.003584050878443  
Tat-mediated HIV elongation arrest and recovery Homo sapiens R-HSA-167243  
0.003584050878443  
HIV elongation arrest and recovery Homo sapiens R-HSA-167287 0.004131410957178  
Pausing and recovery of HIV elongation Homo sapiens R-HSA-167290 0.004131410957178  
Elongation arrest and recovery Homo sapiens R-HSA-112387 0.004131410957178  
TP53 Regulates Metabolic Genes Homo sapiens R-HSA-5628897 0.007527652134665  
Organelle biogenesis and maintenance Homo sapiens R-HSA-1852241 0.007946872541318  
mRNA Splicing - Minor Pathway Homo sapiens R-HSA-72165 0.007980483325977  
Collagen formation Homo sapiens R-HSA-1474290 0.008070508609606  
Cytosolic iron-sulfur cluster assembly Homo sapiens R-HSA-2564830 0.008567396408567  
Synthesis of IP3 and IP4 in the cytosol Homo sapiens R-HSA-1855204 0.009345047876653  
Mitochondrial protein import Homo sapiens R-HSA-1268020 0.009567465153071  
HATs acetylate histones Homo sapiens R-HSA-3214847 0.010452632110631  
Activation of anterior HOX genes in hindbrain development during early embryogenesis Homo  
sapiens R-HSA-5617472 0.010539423674324  
Activation of HOX genes during differentiation Homo sapiens R-HSA-5619507  
0.010539423674324  
SUMOylation of transcription factors Homo sapiens R-HSA-3232118 0.01063311224871  
Beta oxidation of hexanoyl-CoA to butanoyl-CoA Homo sapiens R-HSA-77350  
0.010688704481466  
Beta oxidation of lauroyl-CoA to decanoyl-CoA-CoA Homo sapiens R-HSA-77310  
0.010688704481466

Transcriptional regulation by small RNAs Homo sapiens R-HSA-5578749  
 0.010850049674063  
 Initial triggering of complement Homo sapiens R-HSA-166663 0.013393762250178  
 HIV Transcription Elongation Homo sapiens R-HSA-167169 0.014575502547905  
 Tat-mediated elongation of the HIV-1 transcript Homo sapiens R-HSA-167246  
 0.014575502547905  
 Formation of HIV-1 elongation complex containing HIV-1 Tat Homo sapiens R-HSA-167200  
 0.014575502547905  
 JNK (c-Jun kinases) phosphorylation and activation mediated by activated human TAK1 Homo  
 sapiens R-HSA-450321 0.015558218889148  
 Formation of HIV elongation complex in the absence of HIV Tat Homo sapiens R-HSA-167152  
 0.015998947272924  
 RNA Polymerase II Transcription Elongation Homo sapiens R-HSA-75955  
 0.015998947272924  
 Formation of RNA Pol II elongation complex Homo sapiens R-HSA-112382  
 0.015998947272924  
 ABC-family proteins mediated transport Homo sapiens R-HSA-382556 0.017512010379131  
 ABC transporters in lipid homeostasis Homo sapiens R-HSA-1369062 0.018425430933674  
 Mitochondrial Fatty Acid Beta-Oxidation Homo sapiens R-HSA-77289 0.018425430933674  
 Complement cascade Homo sapiens R-HSA-166658 0.018604195811492  
 FCERI mediated MAPK activation Homo sapiens R-HSA-2871796 0.019837700116543  
 Nectin/Necl trans heterodimerization Homo sapiens R-HSA-420597 0.021457393485099  
 Activation of SMO Homo sapiens R-HSA-5635838 0.021565337764556  
 Pyruvate metabolism and Citric Acid (TCA) cycle Homo sapiens R-HSA-71406  
 0.022609030346532  
 mRNA Splicing Homo sapiens R-HSA-72172 0.024752852947595  
 Signaling by FGFR2 IIIa TM Homo sapiens R-HSA-8851708 0.024978585345306  
 Regulation of TP53 Activity through Methylation Homo sapiens R-HSA-6804760  
 0.024978585345306  
 Platelet activation 15/253  
 Activated PKN1 stimulates transcription of AR (androgen receptor) regulated genes KLK2 and  
 KLK3 Homo sapiens R-HSA-5625886 0.026998616883266  
 Synthesis of PIPs at the plasma membrane Homo sapiens R-HSA-1660499  
 0.026998616883266  
 Insulin-like Growth Factor-2 mRNA Binding Proteins (IGF2BPs/IMPs/VICKZs) bind RNA Homo  
 sapiens R-HSA-428359 0.027975324367416  
 Nicotinamide salvaging Homo sapiens R-HSA-197264 0.027975324367416  
 Regulation of Insulin-like Growth Factor (IGF) transport and uptake by Insulin-like Growth Factor  
 Binding Proteins (IGFBPs) Homo sapiens R-HSA-381426 0.03262224544888  
 Vif-mediated degradation of APOBEC3G Homo sapiens R-HSA-180585 0.033065256651811  
 Type I hemidesmosome assembly Homo sapiens R-HSA-446107 0.035172885633461  
 Crosslinking of collagen fibrils Homo sapiens R-HSA-2243919 0.035172885633461  
 Mitochondrial iron-sulfur cluster biogenesis Homo sapiens R-HSA-1362409  
 0.035172885633461  
 mRNA Splicing - Major Pathway Homo sapiens R-HSA-72163 0.038594022407732  
 MAP2K and MAPK activation Homo sapiens R-HSA-5674135 0.038692546735692  
 MicroRNA (miRNA) biogenesis Homo sapiens R-HSA-203927 0.041341161053944  
 Abortive elongation of HIV-1 transcript in the absence of Tat Homo sapiens R-HSA-167242  
 0.041341161053944  
 BBSome-mediated cargo-targeting to cilium Homo sapiens R-HSA-5620922  
 0.041341161053944

Activation of Ca-permeable Kainate Receptor Homo sapiens R-HSA-451308  
 0.042996739994234  
 Ionotropic activity of Kainate Receptors Homo sapiens R-HSA-451306 0.042996739994234  
 Calcitonin-like ligand receptors Homo sapiens R-HSA-419812 0.042996739994234  
 Chromatin organization Homo sapiens R-HSA-4839726 0.044487155525489  
 Chromatin modifying enzymes Homo sapiens R-HSA-3247509 0.044487155525489  
 Senescence-Associated Secretory Phenotype (SASP) Homo sapiens R-HSA-2559582  
 0.046140900333307  
 Metabolism of water-soluble vitamins and cofactors Homo sapiens R-HSA-196849  
 0.048599986736784  
 Elastic fibre formation Homo sapiens R-HSA-1566948 0.049086225136413  
 Histidine phenylalanine  
 Transcriptional Regulation by TP53 Homo sapiens R-HSA-3700989 0.050253154519771  
 Uptake and function of anthrax toxins Homo sapiens R-HSA-5210891 0.051396373124505  
 Import of palmitoyl-CoA into the mitochondrial matrix Homo sapiens R-HSA-200425  
 0.051396373124505  
 Phenylalanine and tyrosine catabolism Homo sapiens R-HSA-71182 0.051396373124505  
 HDACs deacetylate histones Homo sapiens R-HSA-3214815 0.052067518613155  
 Viral Messenger RNA Synthesis Homo sapiens R-HSA-168325 0.052859570327313  
 Signaling by VEGF Homo sapiens R-HSA-194138 0.055052427945226  
 TP53 Regulates Transcription of DNA Repair Genes Homo sapiens R-HSA-6796648  
 0.055208642067976  
 Gene Silencing by RNA Homo sapiens R-HSA-211000 0.055525694768391  
 FGFR2 alternative splicing Homo sapiens R-HSA-6803529 0.056370167768653  
 ERCC6 (CSB) and EHMT2 (G9a) positively regulate rRNA expression Homo sapiens R-HSA-  
 427389 0.056786145419767  
 Classical antibody-mediated complement activation Homo sapiens R-HSA-173623  
 0.056786145419767  
 Autodegradation of Cdh1 by Cdh1:APC/C Homo sapiens R-HSA-174084  
 0.058456901894455  
 MAPK family signaling cascades Homo sapiens R-HSA-5683057 0.060197436029361  
 Inositol phosphate metabolism Homo sapiens R-HSA-1483249 0.060864869214393  
 RNA Pol II CTD phosphorylation and interaction with CE Homo sapiens R-HSA-167160  
 0.061879766280688  
 RNA Pol II CTD phosphorylation and interaction with CE Homo sapiens R-HSA-77075  
 0.061879766280688  
 Processing of Capped Intron-Containing Pre-mRNA Homo sapiens R-HSA-72203  
 0.0643817578328  
 Metabolism of vitamins and cofactors Homo sapiens R-HSA-196854 0.064642797861647

## Downregulated pathways

### Term P-value

Transcriptional Regulation by TP53 Homo sapiens R-HSA-3700989 1.73383545468243E-06  
 TP53 Regulates Transcription of Cell Death Genes Homo sapiens R-HSA-5633008  
 8.9601120379801E-06  
 Interleukin-1 signaling Homo sapiens R-HSA-446652 1.09377243484373E-05  
 Immune System Homo sapiens R-HSA-168256 1.20860400970762E-05  
 Hemostasis Homo sapiens R-HSA-109582 1.67186807456203E-05  
 Transmembrane transport of small molecules Homo sapiens R-HSA-382551  
 1.67359045754493E-05

SLC-mediated transmembrane transport Homo sapiens R-HSA-425407 2.96276381404827E-05  
 Signaling by Interleukins Homo sapiens R-HSA-449147 4.66658933948091E-05  
 MyD88:Mal cascade initiated on plasma membrane Homo sapiens R-HSA-166058  
 4.83456214883364E-05  
 Toll Like Receptor TLR1:TLR2 Cascade Homo sapiens R-HSA-168179 4.83456214883364E-05  
 Toll Like Receptor TLR6:TLR2 Cascade Homo sapiens R-HSA-168188 4.83456214883364E-05  
 Toll Like Receptor 2 (TLR2) Cascade Homo sapiens R-HSA-181438 4.83456214883364E-05  
 Activated TLR4 signalling Homo sapiens R-HSA-166054 8.16252888327764E-05  
 Cytokine Signaling in Immune system Homo sapiens R-HSA-1280215 9.3609953740681E-05  
 Interactions of Vpr with host cellular proteins Homo sapiens R-HSA-176033  
 0.000122829431746  
 TP53 Regulates Transcription of Cell Cycle Genes Homo sapiens R-HSA-6791312  
 0.000156662849662  
 Toll Like Receptor 4 (TLR4) Cascade Homo sapiens R-HSA-166016 0.000195486168638  
 MAP2K and MAPK activation Homo sapiens R-HSA-5674135 0.000211592800006  
 Cellular responses to stress Homo sapiens R-HSA-2262752 0.000226074800241  
 TP53 Regulates Transcription of Genes Involved in Cytochrome C Release Homo sapiens R-HSA-  
 6803204 0.000302840622228  
 Transferrin endocytosis and recycling Homo sapiens R-HSA-917977 0.000310787112601  
 Toll Like Receptor 10 (TLR10) Cascade Homo sapiens R-HSA-168142 0.000355770470769  
 Toll Like Receptor 5 (TLR5) Cascade Homo sapiens R-HSA-168176 0.000355770470769  
 MyD88 cascade initiated on plasma membrane Homo sapiens R-HSA-975871  
 0.000355770470769  
 TRAF6 mediated induction of NFkB and MAP kinases upon TLR7/8 or 9 activation Homo sapiens  
 R-HSA-975138 0.000392784967455  
 Chondroitin sulfate biosynthesis Homo sapiens R-HSA-2022870 0.00039290380564  
 NOD1/2 Signaling Pathway Homo sapiens R-HSA-168638 0.000455494942948  
 Iron uptake and transport Homo sapiens R-HSA-917937 0.000468519185772  
 MyD88 dependent cascade initiated on endosome Homo sapiens R-HSA-975155  
 0.00047646569162  
 Toll Like Receptor 7/8 (TLR7/8) Cascade Homo sapiens R-HSA-168181 0.00047646569162  
 Transport of glucose and other sugars metal ions and amine compounds Homo sapiens R-  
 HSA-425366  
 TP53 regulates transcription of additional cell cycle genes whose exact role in the p53 pathway  
 remain uncertain Homo sapiens R-HSA-6804115 0.000501797941109  
 TRAF6 Mediated Induction of proinflammatory cytokines Homo sapiens R-HSA-168180  
 0.000578710049939  
 Toll Like Receptor 9 (TLR9) Cascade Homo sapiens R-HSA-168138 0.000629319181835  
 Toll-Like Receptors Cascades Homo sapiens R-HSA-168898 0.000745511391464  
 MAP kinase activation in TLR cascade Homo sapiens R-HSA-450294 0.000751264646938  
 ROS 6/34  
 Innate Immune System Homo sapiens R-HSA-168249 0.000779429683187  
 Deadenylation of mRNA Homo sapiens R-HSA-429947 0.000785732600894
